# Supplementary material for: Application of ionic liquid matrices in spectral analysis of poly(lactide) - solid state NMRspectroscopyversus matrix-assisted laser desorption/ionization time-of-flight (MALDI-TOF) mass spectrometry
Source: Royal Society of Chemistry journal article supplement (doi:10.1039/c2ay05332b), 2011-12-20
Supplement: c2ay05332b.pdf [file c2ay05332b.pdf]

Supporting Materials to Manuscript

Application of ionic liquid matrices in spectral  
analysis of polylactide – solid state NMR  
spectroscopy *versus* matrix-assisted laser  
desorption/ionization time of flight (MALDI-  
TOF) mass spectrometry.

*Beata Miksa, Marek Sochacki, Jan Libiszowski, Andrzej Duda, Włodzimierz Ciesielski,  
and Marek J. Potrzebowski.*

Polish Academy of Sciences, Centre of Molecular and Macromolecular Studies,  
Sienkiewicza 112, 90-363 Lodz, Poland.

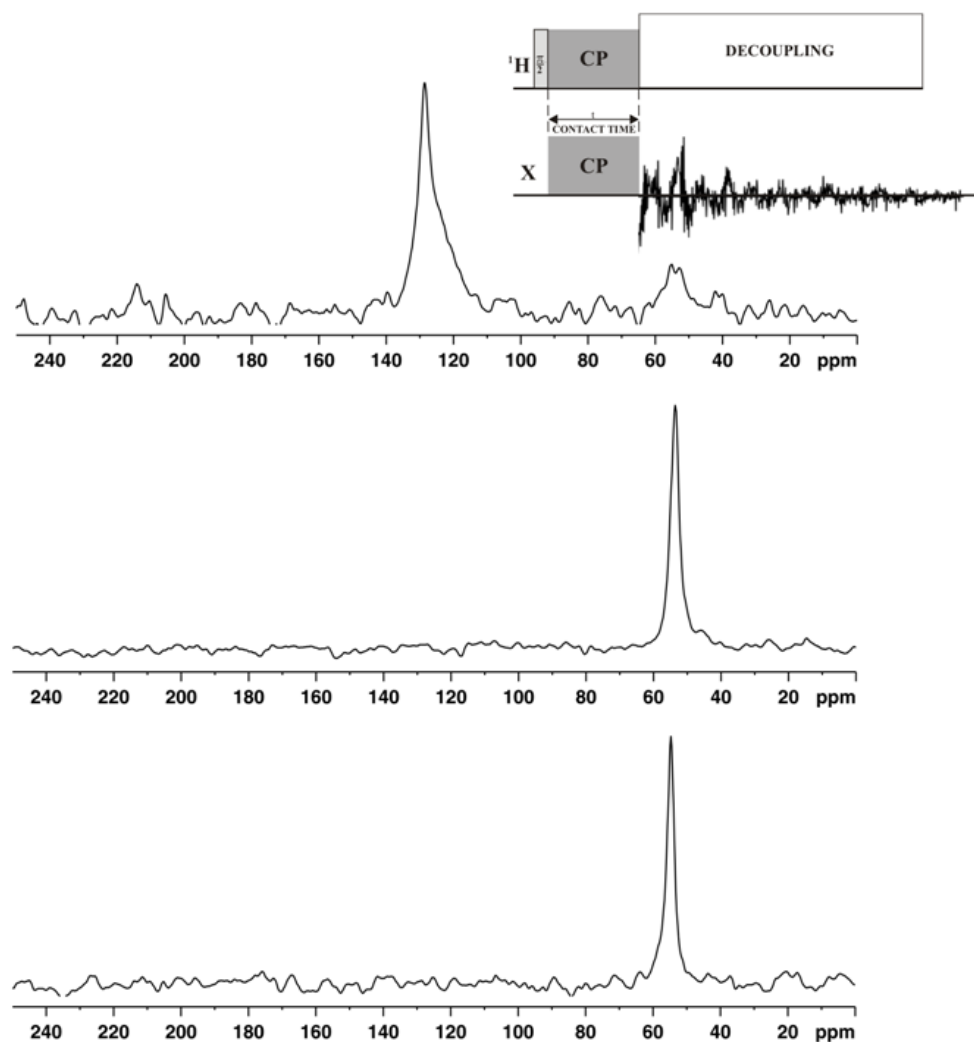

**Fig. S-1.**  $^{15}\text{N}$  CP/MAS spectra of IAA-DEA (top), HABA-DEA (middle) DHB-DEA (bottom) recorded at room temperature with a spinning rate 8 kHz. The broaden signal of DEA for IAA-DEA ILM suggest molecular disorder for this component. The lack of  $-\text{N}=\text{N}-$  signals for HABA means that under standard CP conditions cross-polarization for these nitrogen atoms is not efficient. The CP pulse sequence with defined contact time is shown as top inset.

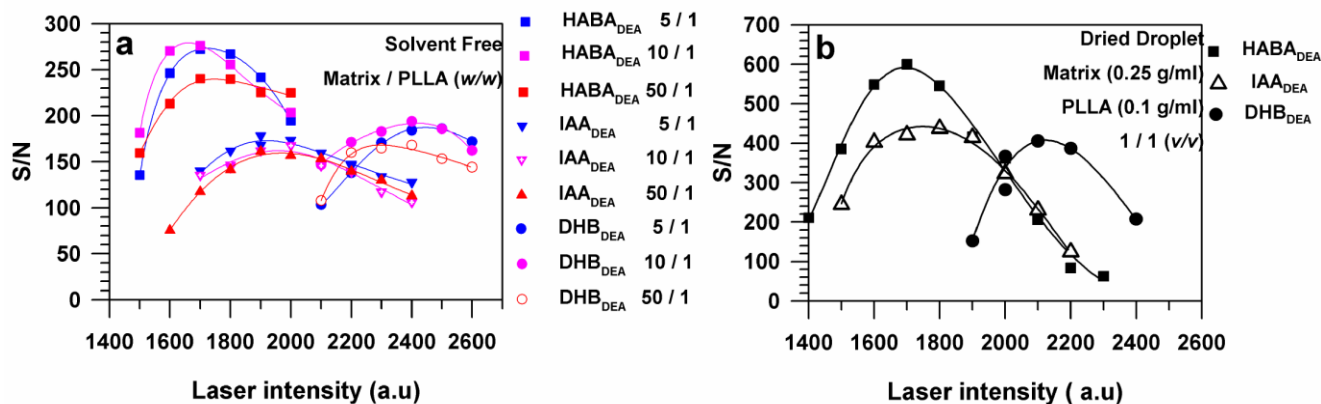

**Fig. S-2.** The dependence  $S/N$  of PLLA on the laser intensity (in arbitrary units) used ILMs: HABA-DEA, IAA-DEA, DHB-DEA according with **a)** SF method for the different ratio matrix to PLLA: 5, 10, 50 ( $w/w$ ), and **b)** DD method for the ratio matrix ( $c = 0.25$  g/ml) to PLLA (0.1 g/ml) 1:1 ( $v/v$ ).

The measurements described homogeneity used ILMs: HABA-DEA, IAA-DEA, DHB-DEA are illustrated at the **Fig.S-2.2**.

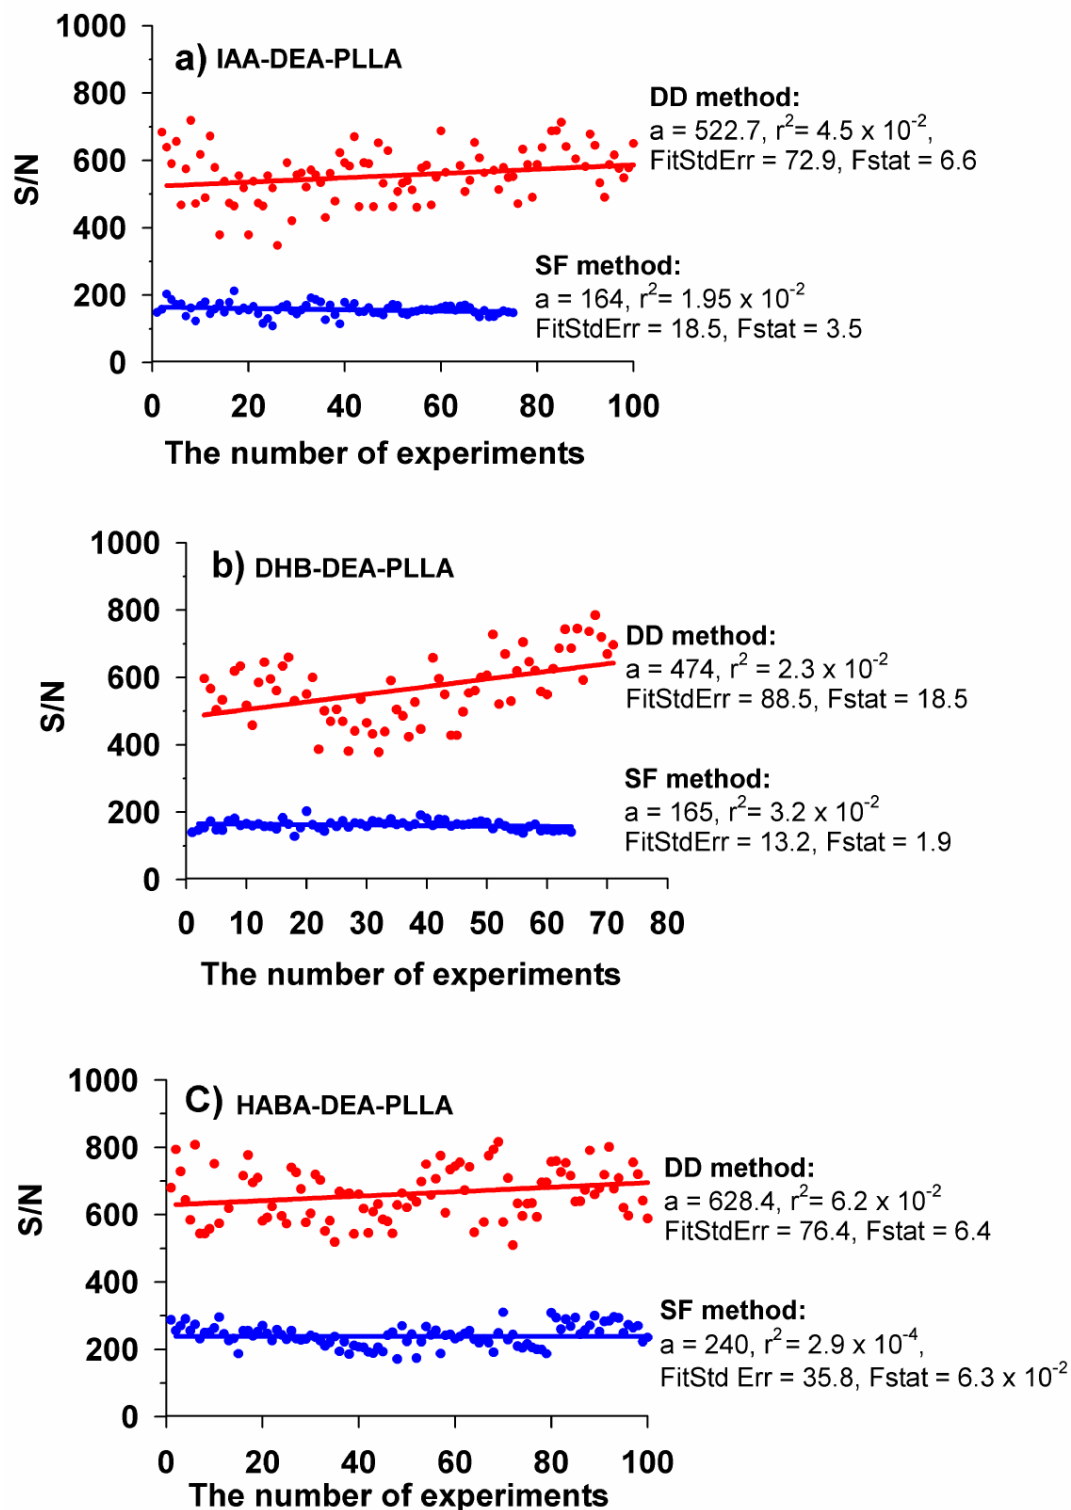

**Fig. S-3.** The values of  $S/N$  of PLLA obtained with ILMs used DD and SF methods for IAA-DEA, DHB-DEA, HABA-DEA illustrated respectively on the graphs: **(a)**, **(b)**, **(c)**. The average number of experiments is about hundred and the points are described by linear equation.

The data points collected at the **Fig. S-2**. came from the tables below:

**Table S-1. The data described of S/N of PLLA used HABA-DEA matrix by DD method.**

| <b>Dried Droplet<br/>HABA-DEA-PLLA<br/>C-polimer(0.1g/ml)<br/>C-matrix(0.25g/ml)</b> | Selected peak              | Laser        | S/N                     | RMS noise | Resolution FW/HM, 50% | Average S/N |
|--------------------------------------------------------------------------------------|----------------------------|--------------|-------------------------|-----------|-----------------------|-------------|
| HABA-DEA-DD 0007                                                                     | 1393.1<br>1465.1<br>1537.2 | <b>1700</b>  | 714.7<br>714.7<br>608.9 | 6.7       | 423<br>443<br>413     | 679.4;      |
| HABA-DEA-DD 0008                                                                     | 1393.2<br>1465.2<br>1537.3 | <b>1700</b>  | 811.9<br>813.7<br>755.1 | 6.0       | 406<br>408<br>416     | 793.5;      |
| HABA-DEA-DD 0009                                                                     | 1392.9<br>1464.9<br>1536.8 | <b>1700</b>  | 683.4<br>804.8<br>695.6 | 3.5       | 408<br>451<br>462     | 727.9;      |
| HABA-DEA-DD 0010                                                                     | 1393.0<br>1464.9<br>1536.9 | <b>18000</b> | 643.6<br>722.4<br>562.7 | 8.6       | 383<br>419<br>386     | 642.9;      |
| HABA-DEA-DD 0011                                                                     | 1393.1<br>1465.1<br>1537.1 | <b>18000</b> | 554.4<br>615.8<br>580.8 | 13.6      | 383<br>388<br>410     | 583.6;      |
| HABA-DEA-DD 0012                                                                     | 1392.8<br>1464.9<br>1536.9 | <b>18000</b> | 782.3<br>862.6<br>777.4 | 6.9       | 387<br>402<br>386     | 807.4;      |
| HABA-DEA-DD 0013                                                                     | 1392.4<br>1465.4<br>1536.3 | <b>18000</b> | 560.2<br>567.7<br>502.2 | 6.8       | 350<br>357<br>364     | 543.4;      |
| HABA-DEA-DD 0014                                                                     | 1392.4<br>1464.4<br>1536.3 | <b>18000</b> | 560.2<br>567.7<br>502.2 | 6.8       | 350<br>357<br>364     | 543.4;      |
| HABA-DEA-DD 0015                                                                     | 1391.9<br>1463.7           | <b>18000</b> | 580.8<br>575.9          | 4.7       | 339<br>337            | 557.3;      |

|                     |                            |              |                         |      |                   |        |
|---------------------|----------------------------|--------------|-------------------------|------|-------------------|--------|
|                     | 1535.7                     |              | 515.3                   |      | 350               |        |
| HABA-DEA-DD<br>0016 | 1392.1<br>1464.1<br>1536.1 | <b>18000</b> | 704.1<br>798.8<br>750.2 | 5.0  | 380<br>386<br>386 | 751.0; |
| HABA-DEA-DD<br>0017 | 1392.1<br>1464.1<br>1536.0 | <b>18000</b> | 570.7<br>608.7<br>541.2 | 6.2  | 297<br>329<br>331 | 573.5; |
| HABA-DEA-DD<br>0018 | 1392.5<br>1464.4<br>1536.6 | <b>18000</b> | 504.5<br>469.2<br>361.1 | 4.3  | 408<br>416<br>366 | 444.9; |
| HABA-DEA-DD<br>0019 | 1393.3<br>1465.3<br>1537.3 | <b>18000</b> | 678.2<br>659.1<br>518.1 | 5.5  | 361<br>382<br>363 | 618.4; |
| HABA-DEA-DD<br>0020 | 1393.0<br>1465.0<br>1537.1 | <b>18000</b> | 457.4<br>431.2<br>398.0 | 3.8  | 378<br>371<br>392 | 428.7; |
| HABA-DEA-DD<br>0021 | 1393.3<br>1465.2<br>1537.2 | <b>1800</b>  | 431.5<br>417.0<br>374.7 | 3.2  | 382<br>403<br>401 | 407.7; |
| HABA-DEA-DD<br>0022 | 1392.4<br>1464.4<br>1536.3 | <b>18000</b> | 634.7<br>764.2<br>747.5 | 5.9  | 368<br>365<br>365 | 715.4; |
| HABA-DEA-DD<br>0023 | 1392.3<br>1464.2<br>1536.2 | <b>18000</b> | 706.0<br>810.4<br>813.7 | 4.7  | 367<br>357<br>365 | 776.7; |
| HABA-DEA-DD<br>0024 | 1393.0<br>1464.9<br>1537.0 | <b>18000</b> | 666.1<br>739.7<br>677.3 | 5.1  | 384<br>399<br>376 | 694.4; |
| HABA-DEA-DD<br>0025 | 1392.6<br>1464.7<br>1536.6 | <b>18000</b> | 700.0<br>726.0<br>700.3 | 3.9  | 416<br>390<br>419 | 708.7; |
| HABA-DEA-DD<br>0026 | 1392.8<br>1464.9<br>1536.9 | <b>18000</b> | 560.4<br>605.1<br>577.4 | 3.5  | 446<br>447<br>447 | 580.9; |
| HABA-DEA-DD<br>0027 | 1393.3<br>1465.3<br>1537.3 | <b>18000</b> | 551.0<br>620.3<br>599.5 | 5.0  | 389<br>395<br>391 | 590.3; |
| HABA-DEA-DD<br>0028 | 1393.5<br>1465.5<br>1537.6 | <b>18000</b> | 598.0<br>651.5<br>622.1 | 9.2  | 371<br>372<br>376 | 623.8; |
| HABA-DEA-DD<br>0029 | 1393.5<br>1465.5<br>1537.5 | <b>18000</b> | 453.4<br>485.5<br>471.6 | 12.5 | 387<br>384<br>388 | 470.2; |
| HABA-DEA-DD<br>0030 | 1393.2<br>1465.3           | <b>18000</b> | 551.2<br>625.2          | 12.1 | 429<br>414        | 595.8; |

|                     |                            |              |                         |             |                   |        |
|---------------------|----------------------------|--------------|-------------------------|-------------|-------------------|--------|
|                     | 1537.3                     |              | 611.1                   |             | 423               |        |
| HABA-DEA-DD<br>0031 | 1393.2<br>1465.2<br>1537.4 | <b>18000</b> | 508.3<br>610.8<br>599.1 | 12.8        | 408<br>402<br>412 | 572.7; |
| HABA-DEA-DD<br>0032 | 1393.1<br>1465.1<br>1537.1 | <b>18000</b> | 699.3<br>762.1<br>758.0 | 7.3         | 410<br>413<br>408 | 739.8; |
| HABA-DEA-DD<br>0033 | 1393.4<br>1465.3<br>1537.4 | <b>18000</b> | 734.8<br>766.6<br>674.6 | 7.3         | 406<br>401<br>398 | 725.2; |
| HABA-DEA-DD<br>0034 | 1393.4<br>1465.3<br>1537.4 | <b>18000</b> | 734.8<br>766.6<br>674.6 | 7.3<br>pwt- | 406<br>401<br>398 | 725.2  |
| HABA-DEA-DD<br>0035 | 1393.6<br>1465.6<br>1537.6 | <b>18000</b> | 646.4<br>708.3<br>672.6 | 6.7         | 402<br>405<br>398 | 675.8; |
| HABA-DEA-DD<br>0036 | 1393.2<br>1465.2<br>1537.1 | <b>18000</b> | 531.7<br>623.3<br>576.4 | 4.3         | 386<br>400<br>400 | 577.1; |
| HABA-DEA-DD<br>0037 | 1393.1<br>1465.1<br>1537.1 | <b>18000</b> | 602.8<br>625.0<br>581.1 | 5.8         | 389<br>380<br>382 | 602.9; |
| HABA-DEA-DD<br>0038 | 1393.2<br>1465.1<br>1537.2 | <b>18000</b> | 665.9<br>762.2<br>727.7 | 8.8         | 446<br>445<br>441 | 718.6; |
| HABA-DEA-DD<br>0039 | 1393.7<br>1465.7<br>1537.6 | <b>18000</b> | 689.5<br>739.9<br>679.1 | 8.2         | 386<br>401<br>408 | 702.8; |
| HABA-DEA-DD<br>0040 | 1393.7<br>1465.6<br>1537.7 | <b>18000</b> | 494.9<br>587.7<br>568.8 | 8.5         | 379<br>396<br>396 | 550.5; |
| HABA-DEA-DD<br>0041 | 1393.4<br>1465.4<br>1537.4 | <b>18000</b> | 565.1<br>621.8<br>556.7 | 5.5         | 398<br>402<br>397 | 581.2; |
| HABA-DEA-DD<br>0042 | 1393.5<br>1465.5<br>1537.6 | <b>18000</b> | 524.7<br>556.5<br>474.1 | 6.2         | 381<br>394<br>388 | 518.4; |
| HABA-DEA-DD<br>0043 | 1393.0<br>1465.1<br>1537.1 | <b>18000</b> | 635.6<br>707.1<br>661.7 | 5.6         | 432<br>432<br>419 | 668.1; |
| HABA-DEA-DD<br>0044 | 1393.3<br>1465.2<br>1537.3 | <b>18000</b> | 623.2<br>695.4<br>660.8 | 6.0         | 375<br>397<br>385 | 659.8; |
| HABA-DEA-DD         | 1393.0                     | <b>18000</b> | 612.4                   | 5.3         | 370               | 663.2; |

|                       |                            |              |                         |     |                   |        |
|-----------------------|----------------------------|--------------|-------------------------|-----|-------------------|--------|
| 0045                  | 1465.0<br>1537.0           |              | 686.1<br>691.5          |     | 375<br>380        |        |
| HABA-DEA-DD<br>0046   | 1393.2<br>1465.3<br>1537.4 | <b>18000</b> | 552.5<br>563.0<br>510.3 | 5.2 | 383<br>374<br>363 | 541.9; |
| HABA-DEA-DD<br>0047   | 1393.2<br>1465.3<br>1537.2 | <b>18000</b> | 656.8<br>686.3<br>637.9 | 6.5 | 390<br>395<br>373 | 660.2; |
| HABA-DEA-DD<br>0048   | 1393.7<br>1465.8<br>1537.8 | <b>18000</b> | 579.9<br>646.1<br>625.5 | 7.6 | 381<br>390<br>378 | 617.2; |
| HABA-DEA-DD<br>0051   | 1393.6<br>1465.7<br>1537.7 | <b>18000</b> | 543.1<br>554.5<br>537.0 | 6.0 | 403<br>399<br>394 | 544.8; |
| HABBA-DEA-<br>DD 0049 | 1393.7<br>1465.7<br>1537.6 | <b>18000</b> | 528.4<br>656.9<br>638.3 | 8.5 | 374<br>419<br>410 | 607.8; |
| HABA-DEA-DD<br>0050   | 1393.1<br>1465.1<br>1537.1 | <b>18000</b> | 583.6<br>675.9<br>631.6 | 4.3 | 398<br>426<br>419 | 630.4; |
| HABA-DEA-DD<br>0052   | 1392.9<br>1464.9<br>1536.8 | <b>18000</b> | 534.8<br>615.6<br>604.0 | 5.4 | 378<br>378<br>374 | 584.8; |
| HABA-DEA-DD<br>0053   | 1393.7<br>1465.7<br>1537.7 | <b>18000</b> | 592.8<br>600.4<br>544.1 | 6.7 | 368<br>369<br>379 | 579.1; |
| HABA-DEA-DD<br>0054   | 1393.6<br>1465.5<br>1537.5 | <b>18000</b> | 534.2<br>569.2<br>528.4 | 6.2 | 347<br>368<br>361 | 543.9; |
| HABA-DEA-DD<br>0055   | 1393.5<br>1465.4<br>1537.5 | <b>18000</b> | 599.3<br>659.2<br>623.9 | 5.6 | 388<br>411<br>408 | 627.5; |
| HABA-DEA-DD<br>0056   | 1393.7<br>1465.7<br>1537.8 | <b>18000</b> | 647.6<br>675.2<br>667.7 | 7.3 | 385<br>375<br>397 | 663.5; |
| HABA-DEA-DD<br>0057   | 1393.0<br>1465.0<br>1537.1 | <b>18000</b> | 567.7<br>662.6<br>631.5 | 3.7 | 406<br>425<br>412 | 620.6; |
| HABA-DEA-DD<br>0058   | 1393.7<br>1465.7<br>1537.7 | <b>18000</b> | 616.5<br>680.2<br>665.5 | 6.7 | 384<br>380<br>397 | 654.1; |
| HABA-DEA-DD<br>0059   | 1393.7<br>1465.8           | <b>18000</b> | 598.4<br>667.4          | 9.0 | 370<br>374        | 637.2; |



|                     |                            |              |                         |      |                   |        |
|---------------------|----------------------------|--------------|-------------------------|------|-------------------|--------|
|                     | 1537.8                     |              | 646.2                   |      | 380               |        |
| HABA-DEA-DD<br>0060 | 1393.5<br>1465.5<br>1537.5 | <b>18000</b> | 617.5<br>724.6<br>749.5 | 8.4  | 379<br>393<br>408 | 697.2; |
| HABA-DEA-DD<br>0061 | 1393.6<br>1465.6<br>1537.7 | <b>18000</b> | 701.0<br>794.1<br>752.7 | 6.4  | 409<br>417<br>414 | 749.3; |
| HABA-DEA-DD<br>0062 | 1393.7<br>1465.7<br>1537.7 | <b>18000</b> | 616.6<br>687.6<br>669.0 | 7.6  | 375<br>387<br>384 | 657.7; |
| HABA-DEA-DD<br>0063 | 1393.4<br>1465.4<br>1537.5 | <b>18000</b> | 659.8<br>732.5<br>725.6 | 11.5 | 388<br>407<br>404 | 705.9; |
| HABA-DEA-DD<br>0064 | 1393.8<br>1465.7<br>1537.8 | <b>18000</b> | 699.5<br>817.7<br>807.2 | 8.7  | 371<br>388<br>389 | 774.8; |
| HABA-DEA-DD<br>0065 | 1393.3<br>1465.5<br>1537.4 | <b>18000</b> | 572.5<br>612.2<br>630.6 | 12.6 | 436<br>402<br>419 | 605.1; |
| HABA-DEA-DD<br>0066 | 1393.6<br>1465.7<br>1537.8 | <b>18000</b> | 668.6<br>763.3<br>768.0 | 8.3  | 383<br>401<br>403 | 733.2; |
| HABA-DEA-DD<br>0067 | 1393.5<br>1465.4<br>1537.5 | <b>18000</b> | 754.6<br>789.4<br>685.7 | 5.9  | 398<br>415<br>389 | 743.2; |
| HABA-DEA-DD<br>0068 | 1393.6<br>1465.7<br>1537.7 | <b>1800</b>  | 700.7<br>780.5<br>782.5 | 8.1  | 380<br>380<br>391 | 754.6; |
| HABA-DEA-DD<br>0069 | 1393.7<br>1465.6<br>1537.8 | <b>1800</b>  | 626.9<br>728.8<br>660.1 | 5.4  | 401<br>418<br>406 | 671.9; |
| HABA-DEA-DD<br>0070 | 1393.3<br>1465.3<br>1537.4 | <b>1800</b>  | 730.1<br>780.6<br>714.9 | 4.6  | 420<br>425<br>423 | 741.2; |
| HABA-DEA-DD<br>0071 | 1393.8<br>1465.7<br>1537.8 | <b>1800</b>  | 484.0<br>568.9<br>588.9 | 10.5 | 369<br>395<br>393 | 547.3; |
| HABA-DEA-DD<br>0072 | 1393.5<br>1465.5<br>1537.5 | <b>1800</b>  | 858.3<br>925.7<br>965.2 | 7.3  | 416<br>416<br>432 | 916.4; |
| HABA-DEA-DD<br>0073 | 1393.7<br>1465.7<br>1537.7 | <b>1800</b>  | 547.3<br>621.7<br>562.8 | 12.9 | 390<br>410<br>392 | 577.3; |
| HABA-DEA-DD         | 1393.7                     | <b>1800</b>  | 740.1                   | 7.2  | 397               | 774.7  |

|                     |                            |             |                         |     |                   |        |
|---------------------|----------------------------|-------------|-------------------------|-----|-------------------|--------|
| 0074                | 1465.7<br>1537.8           |             | 811.7<br>772.4          |     | 395<br>386        |        |
| HABA-DEA-DD<br>0075 | 1393.0<br>1465.0<br>1537.1 | <b>1800</b> | 765.4<br>853.2<br>761.8 | 6.5 | 405<br>418<br>402 | 793.5; |
| HABA-DEA-DD<br>0076 | 1392.8<br>1464.7<br>1536.8 | <b>1800</b> | 773.3<br>861.1<br>812.3 | 5.9 | 384<br>405<br>400 | 815.6; |
| HABA-DEA-DD<br>0077 | 1393.6<br>1465.6<br>1537.6 | <b>1800</b> | 546.4<br>596.7<br>588.8 | 8.4 | 375<br>380<br>386 | 577.3; |
| HABA-DEA-DD<br>0078 | 1393.1<br>1465.1<br>1537.1 | <b>1800</b> | 631.2<br>736.5<br>757.1 | 5.5 | 436<br>437<br>435 | 708.3; |
| HABA-DEA-DD<br>0079 | 1393.7<br>1465.7<br>1537.7 | <b>1800</b> | 464.9<br>542.1<br>519.9 | 9.3 | 351<br>375<br>372 | 508.9; |
| HABA-DEA-DD<br>0080 | 1393.1<br>1465.0<br>1537.0 | <b>1800</b> | 562.9<br>669.2<br>665.7 | 6.3 | 371<br>392<br>385 | 632.6; |
| HABA-DEA-DD<br>0081 | 1392.6<br>1464.6<br>1536.7 | <b>1800</b> | 534.8<br>625.4<br>627.2 | 9.1 | 380<br>403<br>387 | 595.8; |
| HABA-DEA-DD<br>0082 | 1393.4<br>1465.3<br>1537.4 | <b>1800</b> | 580.5<br>681.6<br>632.8 | 9.4 | 389<br>426<br>404 | 631.6; |
| HABA-DEA-DD<br>0083 | 1393.6<br>1465.7<br>1537.7 | <b>1800</b> | 600.0<br>666.3<br>635.3 | 8.0 | 376<br>397<br>391 | 633.8; |
| HABA-DEA-DD<br>0084 | 1393.6<br>1465.6<br>1537.6 | <b>1800</b> | 555.4<br>610.0<br>613.2 | 7.1 | 387<br>394<br>401 | 592.8; |
| HABA-DEA-DD<br>0085 | 1393.4<br>1465.4<br>1537.4 | <b>1800</b> | 678.2<br>737.4<br>671.1 | 7.7 | 382<br>388<br>383 | 695.6; |
| HABA-DEA-DD<br>0086 | 1393.4<br>1465.4<br>1537.4 | <b>1800</b> | 678.2<br>737.4<br>671.1 | 7.7 | 382<br>388<br>383 | 695.6; |
| HABA-DEA-DD<br>0087 | 1393.2<br>1465.2<br>1537.3 | <b>1800</b> | 726.2<br>800.4<br>743.8 | 5.4 | 440<br>454<br>427 | 756.8; |
| HABA-DEA-DD<br>0088 | 1393.4<br>1465.5<br>1537.5 | <b>1800</b> | 722.4<br>799.4<br>753.9 | 6.1 | 409<br>410<br>416 | 758.6; |

|                      |                            |             |                         |     |                   |            |
|----------------------|----------------------------|-------------|-------------------------|-----|-------------------|------------|
| HABA-DEA-DD<br>0089  | 1393.4<br>1465.3<br>1537.4 | <b>1800</b> | 628.7<br>772.0<br>777.9 | 7.9 | 400<br>436<br>437 | 726.2;     |
| HABA-DEA-DD<br>0090  | 1393.4<br>1465.4<br>1537.5 | <b>1800</b> | 674.8<br>804.4<br>781.6 | 5.8 | 407<br>425<br>426 | 753.6;     |
| HABA-DEA-DD<br>0091  | 1393.6<br>1465.6<br>1537.6 | <b>1800</b> | 655.8<br>738.2<br>751.1 | 8.1 | 424<br>424<br>428 | 715.0;     |
| HABA-DEA-DD<br>0092  | 1393.5<br>1465.5<br>1537.6 | <b>1800</b> | 594.4<br>682.2<br>638.3 | 9.5 | 411<br>412<br>417 | 638.3;     |
| HABA-DEA-DD<br>0093  | 1393.4<br>1465.5<br>1537.4 | <b>1800</b> | 588.7<br>659.5<br>672.1 | 8.3 | 419<br>418<br>445 | 640;       |
| HABA-DEA-DD<br>0094  | 1393.6<br>1465.5<br>1537.6 | <b>1800</b> | 613.6<br>715.5<br>689.6 | 7.7 | 398<br>405<br>416 | 672.9;     |
| HABA-DEA-DD<br>0095  | 1392.9<br>1464.8<br>1536.8 | <b>1800</b> | 775.6<br>829.5<br>766.6 | 5.6 | 415<br>411<br>406 | 790.6;     |
| HABA-DEA-DD<br>0096  | 1393.3<br>1465.2<br>1537.2 | <b>1800</b> | 616.5<br>704.1<br>657.5 | 5.6 | 361<br>381<br>376 | 659.4;     |
| HABA-DEA-DD<br>0097  | 1393.3<br>1465.3<br>1537.3 | <b>1800</b> | 660.2<br>715.2<br>660.6 | 6.2 | 394<br>388<br>383 | 678.7;     |
| HABA-DEA-DD<br>0098  | 1393.2<br>1465.3<br>1537.3 | <b>1800</b> | 729.1<br>739.8<br>684.9 | 8.7 | 393<br>380<br>382 | 717.9;     |
| HABA-DEA-DD<br>0099  | 1393.2<br>1465.2<br>1537.3 | <b>1800</b> | 750.2<br>856.4<br>795.6 | 7.9 | 393<br>405<br>407 | 800.7<br>; |
| HABA-DEA-DD<br>00100 | 1393.7<br>1465.7<br>1537.7 | <b>1800</b> | 641.5<br>714.3<br>673.1 | 7.2 | 404<br>400<br>406 | 676.3;     |
| HABA-DEA-DD<br>00101 | 1393.5<br>1465.5<br>1537.5 | <b>1800</b> | 700.7<br>730.9<br>692.8 | 8.4 | 383<br>380<br>383 | 708.1;     |
| HABA-DEA-DD<br>00102 | 1393.6<br>1465.5<br>1537.6 | <b>1800</b> | 572.4<br>653.6<br>634.3 | 8.8 | 367<br>393<br>384 | 620.1;     |
| HABA-DEA-DD<br>00103 | 1393.5<br>1465.5           | <b>1800</b> | 597.3<br>612.5          | 9.8 | 381<br>372        | 596.3;     |

|                            |                            |             |                         |     |                   |        |
|----------------------------|----------------------------|-------------|-------------------------|-----|-------------------|--------|
|                            | 1537.5                     |             | 579.1                   |     | 391               |        |
| HABA-DEA-DD<br>00104       | 1392.8<br>1464.7<br>1536.7 | <b>1800</b> | 762.2<br>785.3<br>715.9 | 7.2 | 403<br>412<br>413 | 754.5; |
| HABA-DEA-DD<br>00105       | 1392.8<br>1464.7<br>1536.7 | <b>1800</b> | 661.8<br>751.9<br>743.0 | 5.3 | 350<br>343<br>344 | 718.9; |
| HABA-DEA-DD<br>00106       | 1393.4<br>1465.4<br>1537.4 | <b>1800</b> | 634.3<br>666.7<br>622.5 | 9.9 | 382<br>382<br>379 | 641.2; |
| HABA-DEA-DD<br>00107       | 1393.3<br>1465.2<br>1537.3 | <b>1800</b> | 547.3<br>615.4<br>600.3 | 6.8 | 387<br>394<br>413 | 587.7; |
| HABA-DEA-DD<br>00108       | 1393.3<br>1465.3<br>1537.4 | <b>1800</b> | 693.0<br>728.4<br>704.6 | 8.7 | 376<br>379<br>394 | 708.7; |
| HABA-DEA-DD<br>00109       | 1393.5<br>1465.5<br>1537.5 | <b>1800</b> | 684.3<br>741.2<br>696.9 | 9.0 | 386<br>363<br>387 | 674.1; |
| HABA-DEA-<br>DDL 00110 lin | 1393.1<br>1465.1<br>1537.1 | <b>1800</b> | 719.1<br>803.1<br>826.5 | 8.3 | 401<br>394<br>413 | 782.9; |
| HABA-DEA-DD<br>00111       | 1393.2<br>1465.1<br>1537.1 | <b>1800</b> | 796.8<br>881.9<br>788.0 | 6.3 | 406<br>435<br>431 | 822.2  |

**Table S-2. The data described of S/N of PLLA used HABA-DEA matrix by SF method.**

| <b>Solvent Free<br/>1mg polymer/<br/>50 mg matrix<br/>HABA-DEA-SF</b> | <b>Selected<br/>peak</b>                                 | <b>Laser</b> | <b>S/N</b>                                         | <b>RMS<br/>noise</b> | <b>Resolution<br/>FW/HM,50%</b>        | <b>Average<br/>S/N</b> |
|-----------------------------------------------------------------------|----------------------------------------------------------|--------------|----------------------------------------------------|----------------------|----------------------------------------|------------------------|
| HABA-DEA-<br>SF 5-10003                                               | 1465.2<br>1537.2<br>1609.0<br>1753.1<br>1897.2<br>1825.2 | 1600         | 176.8<br>196.0<br>256.7<br>283.1<br>259.8<br>290.7 | 4.2                  | 391<br>348<br>366<br>429<br>406<br>455 | 272.5()                |
| HABA-DEA-<br>SF 5-10004                                               | 1465.3<br>1537.3<br>1609.2                               | 1600         | 133.6<br>168.8<br>201.1                            | 3.9                  | 360<br>385<br>378                      | 204.0                  |

|                     |                                                          |      |                                                    |     |                                        |       |
|---------------------|----------------------------------------------------------|------|----------------------------------------------------|-----|----------------------------------------|-------|
|                     | 1753.2<br>1897.5<br>1825.4                               |      | 195.9<br>214.5<br>204.6                            |     | 385<br>452<br>416                      |       |
| HABA-DEA-SF 5-10005 | 1464.6<br>1536.7<br>1608.5<br>1752.7<br>1824.5<br>1896.7 | 1600 | 154.4<br>153.3<br>207.5<br>253.7<br>226.6<br>204.9 | 2.9 | 396<br>349<br>379<br>435<br>430<br>381 | 223.2 |
| HABA-DEA-SF 5-10006 | 1465.3<br>1537.5<br>1608.5<br>1753.5<br>1825.8<br>1897.7 | 1600 | 103.5<br>109.8<br>136.7<br>141.1<br>162.7<br>156.1 | 3.8 | 331<br>323<br>320<br>329<br>385<br>403 | 149.2 |
| HABA-DEA-SF 5-10007 | 1465.3<br>1537.2<br>1609.1<br>1753.1<br>1825.2<br>1897.2 | 1600 | 146.0<br>186.4<br>180.9<br>217.5<br>230.3<br>218.2 | 3.3 | 346<br>401<br>329<br>383<br>429<br>414 | 211.7 |
| HABA-DEA-SF 5-10008 | 1465.5<br>1537.5<br>1609.1<br>1753.6<br>1825.5<br>1897.3 | 1600 | 123.5<br>126.9<br>161.2<br>172.7<br>167.4<br>179.1 | 3.7 | 292<br>294<br>324<br>336<br>338<br>409 | 170.1 |
| HABA-DEA-SF 5-10009 | 1465.7<br>1537.8<br>1609.8<br>1754.0<br>1826.0<br>1898.1 | 1700 | 208.7<br>253.1<br>293.2<br>277.0<br>271.2<br>307.9 | 7.4 | 341<br>349<br>363<br>369<br>358<br>391 | 287.3 |
| HABA-DEA-SF 5-10010 | 1465.6<br>1537.6<br>1609.4<br>1753.8<br>1825.8<br>1898.1 | 1700 | 187.8<br>219.4<br>248.5<br>259.3<br>247.2<br>265.3 | 7.2 | 303<br>327<br>328<br>351<br>338<br>355 | 255.1 |
| HABA-DEA-SF 5-10011 | 1465.4<br>1537.5<br>1609.4<br>1753.6<br>1825.7<br>1897.7 | 1700 | 209.8<br>226.3<br>271.4<br>283.5<br>268.0<br>257.1 | 7.3 | 361<br>345<br>345<br>374<br>375<br>388 | 270   |
| HABA-DEA-SF 5-10012 | 1465.2<br>1537.2<br>1609.2<br>1753.3<br>1825.3           | 1700 | 220.8<br>245.4<br>285.8<br>279.6<br>298.3          | 9.3 | 344<br>331<br>342<br>355<br>362        | 290   |

|                     |                                                          |      |                                                    |      |                                        |        |
|---------------------|----------------------------------------------------------|------|----------------------------------------------------|------|----------------------------------------|--------|
|                     | 1897.3                                                   |      | 296.3                                              |      | 382                                    |        |
| HABA-DEA-SF 5-10013 | 1465.1<br>1537.2<br>1609.1<br>1753.2<br>1825.3<br>1897.3 | 1700 | 206.8<br>216.6<br>258.5<br>264.4<br>249.2<br>248.8 | 7.6  | 337<br>320<br>340<br>373<br>361<br>368 | 255.24 |
| HABA-DEA-SF 5-10014 | 1465.5<br>1537.5<br>1609.4<br>1753.6<br>1825.7<br>1897.6 | 1700 | 216.6<br>238.9<br>265.3<br>261.3<br>294.4<br>271.8 | 7.7  | 338<br>345<br>342<br>352<br>394<br>374 | 273.2  |
| HABA-DEA-SF 5-10015 | 1465.5<br>1537.6<br>1609.6<br>1753.6<br>1825.7<br>1897.6 | 1700 | 181.6<br>196.5<br>231.8<br>222.0<br>228.2<br>243.7 | 6.9  | 315<br>325<br>328<br>344<br>352<br>368 | 231.4  |
| HABA-DEA-SF 5-10016 | 1465.1<br>1537.2<br>1609.1<br>1753.3<br>1825.2<br>1897.3 | 1700 | 187.0<br>201.1<br>237.0<br>249.8<br>251.8<br>257.1 | 9.7  | 332<br>333<br>330<br>369<br>367<br>380 | 248.9  |
| HABA-DEA-SF 5-10017 | 1465.4<br>1537.4<br>1609.3<br>1753.4<br>1825.5<br>1897.6 | 1700 | 184.5<br>210.8<br>236.5<br>263.3<br>251.9<br>249.2 | 8.6  | 321<br>319<br>313<br>363<br>355<br>354 | 250    |
| HABA-DEA-SF 5-10018 | 1465.5<br>1537.6<br>1609.5<br>1753.8<br>1825.7<br>1897.8 | 1700 | 189.7<br>225.0<br>261.0<br>267.8<br>260.3<br>262.9 | 8.3  | 334<br>347<br>343<br>363<br>369<br>402 | 263    |
| HABA-DEA-SF 5-10019 | 1465.6<br>1537.8<br>1609.7<br>1753.9<br>1825.9<br>1898.0 | 1700 | 220.7<br>254.1<br>297.3<br>312.5<br>282.6<br>288.7 | 10.4 | 302<br>319<br>309<br>357<br>337<br>333 | 295.3  |
| HABA-DEA-SF 5-10020 | 1465.6<br>1537.8<br>1609.7<br>1753.9<br>1825.9<br>1898.0 | 1700 | 188.0<br>207.7<br>260.5<br>242.1<br>236.7<br>243.3 | 8.2  | 317<br>300<br>322<br>340<br>337<br>349 | 245.7  |

|                     |                                                          |      |                                                    |      |                                        |       |
|---------------------|----------------------------------------------------------|------|----------------------------------------------------|------|----------------------------------------|-------|
| HABA-DEA-SF 5-10021 | 1465.5<br>1537.5<br>1609.4<br>1753.6<br>1825.7<br>1897.7 | 1700 | 176.6<br>195.6<br>221.3<br>231.6<br>236.7<br>213.1 | 8.5  | 319<br>333<br>336<br>350<br>373<br>364 | 225.7 |
| HABA-DEA-SF 5-10022 | 1466.5<br>1538.6<br>1610.7<br>1755.1<br>1826.9<br>1899.2 | 1700 | 138.1<br>203.3<br>225.5<br>234.3<br>249.7<br>219   | 7.2  | 297<br>293<br>300<br>323<br>335<br>298 | 232   |
| HABA-DEA-SF 5-10023 | 1466.1<br>1538.3<br>1610.2<br>1754.5<br>1826.6<br>1898.6 | 1700 | 153.9<br>171.9<br>187.3<br>191.7<br>192.9<br>204.6 | 6.1  | 290<br>306<br>292<br>311<br>324<br>335 | 186.6 |
| HABA-DEA-SF 5-10024 | 1465.2<br>1537.2<br>1609.2<br>1753.4<br>1825.3<br>1897.3 | 1700 | 195.0<br>224.0<br>235<br>261.6<br>250.1<br>271.1   | 8.7  | 319<br>337<br>324<br>361<br>354<br>386 | 254.5 |
| HABA-DEA-SF 5-10025 | 1465.1<br>1537.3<br>1609.2<br>1753.5<br>1825.4<br>1897.5 | 1800 | 208.7<br>228.4<br>257.7<br>253.4<br>245.6<br>260.7 | 7.3  | 325<br>356<br>332<br>365<br>366<br>386 | 254.4 |
| HABA-DEA-SF 5-10026 | 1465.2<br>1537.1<br>1609.0<br>1753.2<br>1825.2<br>1897.1 | 1800 | 179.0<br>208.1<br>222.8<br>246.5<br>239.2<br>251.3 | 11.4 | 313<br>315<br>307<br>339<br>325<br>363 | 239.9 |
| HABA-DEA-SF 5-10027 | 1465.8<br>1537.9<br>1610.0<br>1754.1<br>1826.1<br>1898.2 | 1800 | 201.9<br>221.0<br>243.1<br>249.2<br>253.8<br>261.4 | 7.3  | 297<br>283<br>293<br>289<br>307<br>329 | 251.9 |
| HABA-DEA-SF 5-10027 | 1465.6<br>1537.7<br>1609.8<br>1753.9<br>1825.9<br>1898.0 | 1800 | 213.4<br>234.5<br>266.2<br>268.0<br>268.4<br>277.9 | 5.3  | 286<br>275<br>284<br>297<br>297<br>319 | 270.1 |
| HABA-DEA-SF 5-10028 | 1466.3<br>1538.3                                         | 1800 | 196.0<br>231.0                                     | 12.1 | 291<br>296                             | 246.0 |

|                     |                                                          |      |                                                    |      |                                        |       |
|---------------------|----------------------------------------------------------|------|----------------------------------------------------|------|----------------------------------------|-------|
|                     | 1610.4<br>1754.5<br>1826.7<br>1898.8                     |      | 223.2<br>251.5<br>262.8<br>246.7                   |      | 287<br>316<br>326<br>322               |       |
| HABA-DEA-SF 5-10029 | 1465.8<br>1537.9<br>1609.9<br>1754.1<br>1826.2<br>1898.1 | 1800 | 173.9<br>192.1<br>223.7<br>229.3<br>225.3<br>224.2 | 13.9 | 275<br>288<br>299<br>306<br>310<br>315 | 225.6 |
| HABA-DEA-SF 5-10030 | 1465.8<br>1537.0<br>1608.9<br>1754.1<br>1825.1<br>1897.0 | 1800 | 201.2<br>223.9<br>247.8<br>265.6<br>261.8<br>253.7 | 10.6 | 311<br>318<br>313<br>342<br>349<br>353 | 257.2 |
| HABA-DEA-SF 5-10031 | 1465.2<br>1537.3<br>1609.2<br>1753.3<br>1825.4<br>1897.4 | 1800 | 217.3<br>244.1<br>263.9<br>268.4<br>275.6<br>259.4 | 7.8  | 298<br>309<br>297<br>313<br>320<br>322 | 241.8 |
| HABA-DEA-SF 5-10032 | 1465.2<br>1537.2<br>1609.2<br>1753.3<br>1825.4<br>1897.4 | 1800 | 174.9<br>201.3<br>220.4<br>227.6<br>231.2<br>236.3 | 10.7 | 291<br>302<br>299<br>317<br>325<br>333 | 228.9 |
| HABA-DEA-SF 5-10033 | 1465.6<br>1537.6<br>1609.7<br>1753.9<br>1825.8<br>1897.9 | 1800 | 206.5<br>224.3<br>256.3<br>256.7<br>256.6<br>247.4 | 12.0 | 316<br>323<br>330<br>342<br>353<br>351 | 254.3 |
| HABA-DEA-SF 5-10034 | 1465.9<br>1537.9<br>1609.9<br>1754.1<br>1826.2<br>1898.2 | 1800 | 180.2<br>210.3<br>224.7<br>233.0<br>231.9<br>233.6 | 12.8 | 298<br>320<br>323<br>346<br>332<br>355 | 230.8 |
| HABA-DEA-SF 5-10035 | 1465.7<br>1538.0<br>1610.0<br>1754.2<br>1826.2<br>1898.2 | 1800 | 175.3<br>190.9<br>219.5<br>230.3<br>230.1<br>228.0 | 10.4 | 321<br>321<br>312<br>344<br>336<br>329 | 226.9 |
| HABA-DEA-SF 5-10036 | 1466.2<br>1538.3<br>1610.3<br>1754.5                     | 1800 | 166.3<br>203.9<br>218.4<br>237.7                   | 9.6  | 268<br>280<br>290<br>307               | 229.8 |



|                     |                                                          |      |                                                    |      |                                        |       |
|---------------------|----------------------------------------------------------|------|----------------------------------------------------|------|----------------------------------------|-------|
|                     | 1826.5<br>1898.6                                         |      | 230.7<br>232.6                                     |      | 305<br>311                             |       |
| HABA-DEA-SF 5-10037 | 1465.2<br>1537.3<br>1609.3<br>1753.4<br>1825.5<br>1897.4 | 1900 | 197.6<br>213.2<br>233.3<br>240.9<br>247.7<br>238.5 | 14   | 324<br>301<br>319<br>345<br>339<br>348 | 240.1 |
| HABA-DEA-SF 5-10038 | 1465.2<br>1537.4<br>1609.3<br>1753.4<br>1825.4<br>1897.4 | 1900 | 182.4<br>209.3<br>229.4<br>248.0<br>234.6<br>230.8 | 18.1 | 312<br>318<br>319<br>348<br>343<br>337 | 235.7 |
| HABA-DEA-SF 5-10039 | 1466.0<br>1538.0<br>1610.1<br>1754.2<br>1826.4<br>1898.4 | 1900 | 195.9<br>210.0<br>213.3<br>236.1<br>229.6<br>222.7 | 15.4 | 318<br>307<br>321<br>332<br>332<br>324 | 225.4 |
| HABA-DEA-SF 5-10040 | 1466.7<br>1538.8<br>1610.9<br>1755.2<br>1827.3<br>1899.4 | 1900 | 173.3<br>185.5<br>205.4<br>205.3<br>214.5<br>215.3 | 16.4 | 300<br>304<br>299<br>313<br>312<br>320 | 210.1 |
| HABA-DEA-SF 5-10041 | 1465.5<br>1537.6<br>1609.5<br>1753.7<br>1825.8<br>1897.8 | 1900 | 183.0<br>201.3<br>214.9<br>224.1<br>223.2<br>219.3 | 16.6 | 307<br>305<br>316<br>339<br>336<br>335 | 220.4 |
| HABA-DEA-SF 5-10042 | 1465.8<br>1537.9<br>1609.9<br>1754.1<br>1826.2<br>1898.2 | 1900 | 200.8<br>228.7<br>240.3<br>243.3<br>231.9<br>234.8 | 17.5 | 324<br>336<br>338<br>352<br>328<br>345 | 237.5 |
| HABA-DEA-SF 5-10043 | 1467.0<br>1539.1<br>1611.2<br>1755.4<br>1827.6<br>1899.6 | 1900 | 156.6<br>184.1<br>190.1<br>190.1<br>196.9<br>198.7 | 16.7 | 297<br>307<br>293<br>303<br>306<br>318 | 193.9 |
| HABA-DEA-SF 5-10044 | 1466.6<br>1538.7<br>1610.7<br>1754.9<br>1826.9<br>1899.1 | 1900 | 171.0<br>198.4<br>221.9<br>225.8<br>220.6<br>222.9 | 14.0 | 287<br>288<br>306<br>314<br>323<br>325 | 222.8 |

|                     |                                                          |      |                                                    |      |                                        |       |
|---------------------|----------------------------------------------------------|------|----------------------------------------------------|------|----------------------------------------|-------|
| HABA-DEA-SF 5-10045 | 1466.6<br>1538.9<br>1610.8<br>1755.2<br>1827.3<br>1899.4 | 2000 | 152.9<br>170.5<br>171.5<br>185.9<br>203.5<br>181.1 | 17.1 | 276<br>297<br>274<br>294<br>311<br>298 | 185.5 |
| HABA-DEA-SF 5-10046 | 1466.6<br>1538.1<br>1610.2<br>1754.4<br>1826.4<br>1898.5 | 2000 | 172.6<br>198.6<br>203.2<br>212.9<br>214.1<br>211.7 | 17.5 | 311<br>316<br>310<br>323<br>328<br>338 | 210.5 |
| HABA-DEA-SF 5-10047 | 1465.4<br>1537.5<br>1609.5<br>1753.8<br>1825.7<br>1897.9 | 2000 | 171.4<br>188.0<br>201.2<br>209.1<br>217.5<br>198.8 | 21.1 | 313<br>298<br>315<br>316<br>340<br>321 | 206.7 |
| HABA-DEA-SF 5-10048 | 1466.0<br>1538.2<br>1610.4<br>1754.6<br>1826.6<br>1898.7 | 2000 | 172.5<br>194.6<br>200.7<br>208.4<br>209.7<br>203.3 | 19.7 | 307<br>302<br>311<br>315<br>325<br>321 | 205.5 |
| HABA-DEA-SF 5-10049 | 1467.2<br>1539.3<br>1611.5<br>1755.7<br>1827.9<br>1900.0 | 2000 | 151.5<br>176.0<br>183.3<br>196.2<br>195.9<br>192.3 | 18.0 | 277<br>292<br>281<br>298<br>300<br>302 | 191.9 |
| HABA-DEA-SF 5-10050 | 1467.6<br>1539.8<br>1612.0<br>1756.4<br>1828.4<br>1900.6 | 2000 | 152.5<br>171.7<br>181.0<br>191.2<br>189.6<br>189.2 | 20.6 | 285<br>291<br>285<br>295<br>288<br>302 | 187.8 |
| HABA-DEA-SF 5-10051 | 1465.8<br>1537.9<br>1609.8<br>1754.0<br>1826.2<br>1898.1 | 2000 | 173.5<br>189.4<br>211.5<br>204.2<br>206.6<br>199.6 | 19.7 | 305<br>297<br>316<br>311<br>323<br>335 | 205.5 |
| HABA-DEA-SF 5-10052 | 1466.5<br>1538.7<br>1610.6<br>1755.0<br>1827.0<br>1899.2 | 2000 | 160.0<br>186.4<br>188.3<br>200.1<br>193.2<br>190.6 | 18.5 | 264<br>289<br>281<br>296<br>298<br>299 | 193.1 |
| HABA-DEA-SF 5-10053 | 1464.5<br>1536.4                                         | 1500 | 127.0<br>135.5                                     | 2.4  | 358<br>335                             | 171.2 |

|                     |                                                          |      |                                                    |     |                                        |       |
|---------------------|----------------------------------------------------------|------|----------------------------------------------------|-----|----------------------------------------|-------|
|                     | 1608.2<br>1752.2<br>1824.5<br>1896.3                     |      | 184.2<br>170.5<br>172.5<br>157.7                   |     | 344<br>390<br>381<br>414               |       |
| HABA-DEA-SF 5-10054 | 1465.3<br>1537.3<br>1609.2<br>1753.4<br>1825.4<br>1897.4 | 1600 | 176.3<br>185.0<br>252.0<br>242.4<br>235.5<br>235.9 | 4.9 | 322<br>332<br>345<br>363<br>350<br>375 | 241.5 |
| HABA-DEA-SF 5-10055 | 1465.0<br>1537.1<br>1609.0<br>1753.3<br>1825.2<br>1897.1 | 1600 | 187.7<br>209.9<br>243.1<br>247.5<br>235.0<br>273.8 | 4.4 | 332<br>358<br>348<br>374<br>363<br>418 | 249.9 |
| HABA-DEA-SF 5-10056 | 1465.1<br>1537.3<br>1609.1<br>1753.4<br>1825.3<br>1897.5 | 1600 | 112.7<br>142.5<br>158.5<br>174.1<br>180.3<br>171.5 | 4.2 | 315<br>347<br>313<br>355<br>372<br>365 | 171.1 |
| HABA-DEA-SF 5-10057 | 1464.9<br>1536.9<br>1608.9<br>1753.1<br>1825.1<br>1897.1 | 1700 | 200.1<br>235.2<br>256.5<br>272.5<br>282.5<br>266.0 | 8.6 | 340<br>358<br>347<br>365<br>384<br>383 | 269.4 |
| HABA-DEA-SF 5-10059 | 1465.8<br>1537.9<br>1610.0<br>1754.2<br>1826.2<br>1898.3 | 1700 | 176.4<br>205.4<br>220.9<br>225.5<br>211.5<br>234.9 | 7.5 | 338<br>346<br>329<br>365<br>349<br>365 | 223.2 |
| HABA-DEA-SF 5-10060 | 1465.6<br>1537.6<br>1609.8<br>1753.9<br>1825.9<br>1898.1 | 1700 | 130.2<br>154.7<br>159.9<br>183.4<br>174.6<br>179.4 | 7.8 | 296<br>339<br>298<br>344<br>340<br>353 | 174.2 |
| HABA-DEA-SF 5-10061 | 1465.3<br>1537.3<br>1609.1<br>1753.4<br>1825.5<br>1897.4 | 1700 | 193.4<br>212.9<br>236.7<br>247.4<br>250.9<br>242.8 | 7.8 | 329<br>343<br>327<br>360<br>354<br>369 | 244.5 |
| HABA-DEA-SF 5-10062 | 1465.3<br>1537.3<br>1609.3<br>1753.5                     | 1700 | 177.1<br>198.0<br>213.1<br>218.7                   | 9.5 | 337<br>342<br>339<br>341               | 222.2 |

|                     |                                                          |      |                                                    |      |                                        |       |
|---------------------|----------------------------------------------------------|------|----------------------------------------------------|------|----------------------------------------|-------|
|                     | 1825.4<br>1897.5                                         |      | 230.8<br>226.3                                     |      | 359<br>362                             |       |
| HABA-DEA-SF 5-10063 | 1465.3<br>1537.3<br>1609.2<br>1753.4<br>1825.4<br>1897.4 | 1700 | 206.6<br>231.5<br>272.6<br>269.8<br>264.7<br>262.6 | 8.7  | 331<br>336<br>358<br>368<br>378<br>382 | 267.4 |
| HABA-DEA-SF 5-10064 | 1465.7<br>1537.8<br>1609.8<br>1753.9<br>1826.0<br>1898.0 | 1800 | 185.1<br>212.1<br>230.2<br>246.2<br>253.4<br>239.7 | 12.4 | 315<br>329<br>331<br>350<br>354<br>354 | 242.4 |
| HABA-DEA-SF 5-10065 | 1465.6<br>1537.8<br>1609.7<br>1753.9<br>1825.9<br>1897.9 | 1800 | 189.4<br>218.4<br>259.9<br>255.9<br>255.9<br>251.0 | 12.0 | 336<br>351<br>352<br>368<br>359<br>362 | 255.7 |
| HABA-DEA-SF 5-10066 | 1465.8<br>1537.8<br>1609.7<br>1754.1<br>1826.1<br>1898.0 | 1800 | 139.9<br>161.1<br>175.3<br>179.5<br>198.3<br>196.1 | 11.3 | 302<br>305<br>310<br>307<br>339<br>335 | 187.3 |
| HABA-DEA-SF 5-10067 | 1465.5<br>1537.5<br>1609.4<br>1753.6<br>1825.6<br>1897.7 | 1800 | 194.8<br>220.2<br>260.9<br>248.1<br>254.3<br>237.1 | 12.5 | 329<br>338<br>349<br>351<br>371<br>357 | 250.1 |
| HABA-DEA-SF 5-10068 | 1465.3<br>1537.3<br>1609.3<br>1753.4<br>1825.4<br>1897.5 | 1800 | 189.0<br>206.1<br>228.0<br>252.3<br>241.8<br>242.0 | 11.4 | 312<br>328<br>325<br>354<br>356<br>361 | 241.0 |
| HABA-DEA-SF 5-10069 | 1465.6<br>1537.7<br>1609.6<br>1753.9<br>1825.9<br>1897.5 | 1800 | 189.0<br>215.6<br>228.3<br>247.4<br>251.7<br>247.1 | 13.3 | 327<br>345<br>335<br>354<br>354<br>374 | 243.6 |
| HABA-DEA-SF 5-10070 | 1465.5<br>1537.7<br>1609.7<br>1753.9<br>1825.8<br>1897.9 | 1800 | 174.0<br>193.7<br>221.8<br>240.1<br>240.0<br>222.4 | 10.8 | 327<br>330<br>316<br>363<br>362<br>342 | 231.1 |

|                     |                                                          |      |                                                    |      |                                        |       |
|---------------------|----------------------------------------------------------|------|----------------------------------------------------|------|----------------------------------------|-------|
| HABA-DEA-SF 5-10071 | 1465.4<br>1537.6<br>1609.5<br>1753.7<br>1825.7<br>1897.7 | 1800 | 165.4<br>204.8<br>223.8<br>243.2<br>252.9<br>231.0 | 12.4 | 311<br>330<br>324<br>350<br>372<br>345 | 237.7 |
| HABA-DEA-SF 5-10072 | 1465.7<br>1537.8<br>1609.9<br>1754.0<br>1826.1<br>1898.1 | 1800 | 199.0<br>215.1<br>234.8<br>250.1<br>252.2<br>245.9 | 13.5 | 331<br>341<br>330<br>357<br>363<br>355 | 245.8 |
| HABA-DEA-SF 5-10073 | 1466.6<br>1538.7<br>1610.8<br>1755.1<br>1827.1<br>1899.3 | 1700 | 218.8<br>223.3<br>249.2<br>256.3<br>250.7<br>263.5 | 4.1  | 363<br>332<br>349<br>354<br>391<br>368 | 254.9 |
| HABA-DEA-SF 5-10074 | 1466.2<br>1538.3<br>1610.3<br>1754.5<br>1826.5<br>1898.6 | 1700 | 173.2<br>198.0<br>207.2<br>249.5<br>233.2<br>226.2 | 6.8  | 351<br>350<br>331<br>385<br>354<br>388 | 229.0 |
| HABA-DEA-SF 5-10075 | 1466.3<br>1538.3<br>1610.5<br>1754.7<br>1826.8<br>1899.0 | 1700 | 193.4<br>218.4<br>214.9<br>227.3<br>216.0<br>218.6 | 4.5  | 280<br>306<br>279<br>315<br>297<br>322 | 219.0 |
| HABA-DEA-SF 5-10076 | 1467.0<br>1539.0<br>1611.2<br>1755.4<br>1827.4<br>1899.6 | 1800 | 168.2<br>205.7<br>215.4<br>234.5<br>230.7<br>241.7 | 8.4  | 309<br>351<br>327<br>340<br>341<br>347 | 230.6 |
| HABA-DEA-SF 5-10077 | 1467.1<br>1539.3<br>1611.4<br>1755.7<br>1827.8<br>1899.9 | 1800 | 160.4<br>212.7<br>207.3<br>225.1<br>233.2<br>222.1 | 11.1 | 311<br>371<br>332<br>348<br>367<br>358 | 220.0 |
| HABA-DEA-SF 5-10078 | 1467.2<br>1539.5<br>1611.6<br>1755.8<br>1827.9<br>1900.9 | 1800 | 134.9<br>161.9<br>174.6<br>199.1<br>192.9<br>195.2 | 9.1  | 324<br>336<br>324<br>352<br>352<br>360 | 190.5 |
| HABA-DEA-SF 5-10079 | 1467.3<br>1539.5                                         | 1800 | 174.0<br>210.4                                     | 9.1  | 322<br>330                             | 247.8 |

|                       |                                                          |      |                                                    |      |                                        |       |
|-----------------------|----------------------------------------------------------|------|----------------------------------------------------|------|----------------------------------------|-------|
|                       | 1611.6<br>1755.9<br>1828.1<br>1900.2                     |      | 234.1<br>257.9<br>247.7<br>251.6                   |      | 334<br>348<br>347<br>340               |       |
| HABA-DEA-SF 5-10080   | 1466.9<br>1539.1<br>1611.1<br>1755.5<br>1827.5<br>1899.7 | 1800 | 264.9<br>295.4<br>313.5<br>318.7<br>304.1<br>301.3 | 9.5  | 319<br>347<br>338<br>334<br>332<br>330 | 309.4 |
| HABA-DEA-SF 5-10081   | 1465.9<br>1537.9<br>1610.0<br>1754.2<br>1826.2<br>1898.2 | 1900 | 180.0<br>198.3<br>225.9<br>226.2<br>231.8<br>228.3 | 15.7 | 313<br>312<br>328<br>338<br>346<br>347 | 228.1 |
| HABA-DEA – SF 5-10082 | 1466.0<br>1538.1<br>1610.1<br>1754.3<br>1826.3<br>1898.3 | 1900 | 193.1<br>223.2<br>245.2<br>245.3<br>244.2<br>238.7 | 17.9 | 308<br>327<br>330<br>350<br>344<br>353 | 243.4 |
| HABA-DEA-SF 5-10083   | 1466.0<br>1538.2<br>1610.1<br>1754.3<br>1826.4<br>1898.3 | 1900 | 165.2<br>188.5<br>201.0<br>214.4<br>215.0<br>206.1 | 18.2 | 304<br>312<br>307<br>329<br>336<br>339 | 209.1 |
| HABA-DEA-SF 5-10084   | 1466.3<br>1538.4<br>1610.5<br>1754.7<br>1826.7<br>1898.9 | 2000 | 181.7<br>197.7<br>205.2<br>204.2<br>212.3<br>193.0 | 21.7 | 308<br>303<br>308<br>330<br>330<br>313 | 203.7 |
| HABA-DEA-SF 5-10085   | 1466.1<br>1538.2<br>1610.2<br>1754.5<br>1826.6<br>1898.6 | 2000 | 177.5<br>201.0<br>209.7<br>224.8<br>217.2<br>211.5 | 18.8 | 299<br>302<br>315<br>328<br>327<br>327 | 215.8 |
| HABA-DEA-SF 5-10086   | 1466.4<br>1538.6<br>1610.5<br>1754.8<br>1826.9<br>1899.0 | 2000 | 172.2<br>201.4<br>205.9<br>209.4<br>200.8<br>202.3 | 22.6 | 294<br>298<br>303<br>322<br>316<br>315 | 204.6 |

|                     |                                                          |      |                                                    |      |                                                    |               |
|---------------------|----------------------------------------------------------|------|----------------------------------------------------|------|----------------------------------------------------|---------------|
| HABA-DEA-SF 5-10087 | 1466.2<br>1538.2<br>1610.3<br>1754.5<br>1826.6<br>1898.6 | 2000 | 165.0<br>185.5<br>198.1<br>199.7<br>204.4<br>195.4 | 18.5 | 294<br>314<br>314<br>315<br>329<br>314             | 199.4         |
| HABA-DEA-SF 5-10088 | 1466.7<br>1538.9<br>1610.9<br>1755.2<br>1827.3<br>1899.3 | 2000 | 171.0<br>187.2<br>197.5<br>196.7<br>196.5<br>202.4 | 19.7 | 284<br>286<br>278<br>304<br>303<br>313             | 198.3         |
| HABA-DEA-SF 5-10089 | 1467.3<br>1539.5<br>1611.7<br>1756.0<br>1828.1<br>1900.1 | 2000 | 149.4<br>167.6<br>181.3<br>192.0<br>189.6<br>182.1 | 20.8 | 261<br>283<br>285<br>303<br>310<br>302             | 186.3         |
| HABA-DEA-SF 50024   | 1466.7<br>1538.8<br>1610.8<br>1755.1<br>1827.1<br>1899.2 | 1700 | 254.6<br>290.8<br>297.3<br>332.1<br>298.0<br>322.8 | 9.2  | 379.0<br>398.0<br>371.0<br>402.0<br>396.0<br>420.0 | Lin.<br>308.2 |
| HABA-DEA-SF 50025   | 1466.3<br>1538.4<br>1610.4<br>1754.6<br>1826.7<br>1898.7 | 1700 | 261.3<br>269.0<br>284.3<br>301.3<br>293.9<br>295.5 | 9.3  | 380.0<br>356.0<br>360.0<br>371.0<br>375.0<br>386.0 | 293.8         |
| HABA-DEA-SF 50026   | 1466.0<br>1538.1<br>1610.1<br>1754.4<br>1826.3<br>1898.4 | 1700 | 194.5<br>235.0<br>252.6<br>253.4<br>272.6<br>258.8 | 8.2  | 336<br>355<br>346<br>381<br>380<br>379             | 259.4         |
| HABA-DEA-SF 50027   | 1466.0<br>1538.0<br>1610.0<br>1754.2<br>1826.3<br>1898.3 | 1700 | 228.2<br>236.2<br>276.9<br>298.2<br>292.7<br>288.1 | 7.3  | 389<br>378<br>389<br>418<br>425<br>410             | 288.9         |
| HABA-DEA-SF 50028   | 1466.4<br>1538.5<br>1610.5<br>1754.8<br>1826.8<br>1898.9 | 1700 | 192.9<br>246.6<br>273.6<br>273.6<br>258.9<br>266.4 | 8.2  | 329<br>364<br>368<br>365<br>355<br>378             | 268.1         |
| HABA-DEA-SF 50029   | 1466.4<br>1538.2                                         | 1700 | 220.2<br>226.5                                     | 6.4  | 373<br>352                                         | 293.2         |

|                   |                                                          |      |                                                    |      |                                        |       |
|-------------------|----------------------------------------------------------|------|----------------------------------------------------|------|----------------------------------------|-------|
|                   | 1610.2<br>1754.8<br>1826.5<br>1898.4                     |      | 285.4<br>286.9<br>308.2<br>292.1                   |      | 391<br>396<br>405<br>406               |       |
| HABA-DEA-SF 50030 | 1467.0<br>1539.1<br>1611.1<br>1755.4<br>1827.5<br>1899.4 | 1700 | 184.6<br>195.2<br>206.8<br>254.8<br>239.9<br>238.0 | 2.9  | 304<br>320<br>295<br>362<br>362<br>354 | 244.2 |
| HABA-DEA-SF 50031 | 1466.7<br>1538.8<br>1610.9<br>1755.1<br>1827.2<br>1899.3 | 1800 | 194.2<br>213.8<br>238.5<br>266.5<br>266.2<br>254.7 | 10.8 | 338<br>330<br>322<br>362<br>362<br>346 | 256.5 |
| HABA-DEA-SF 50032 | 1466.1<br>1538.3<br>1610.3<br>1754.5<br>1826.5<br>1898.5 | 1800 | 210.7<br>230.7<br>263.0<br>273.0<br>276.5<br>271.0 | 13.4 | 357<br>339<br>365<br>381<br>367<br>381 | 270.9 |
| HABA-DEA-SF 50033 | 1466.3<br>1538.5<br>1610.4<br>1754.6<br>1826.7<br>1898.7 | 1800 | 235.1<br>266.1<br>286.7<br>306.9<br>306.0<br>296.8 | 11.0 | 351<br>353<br>354<br>376<br>374<br>385 | 299.1 |
| HABA-DEA-SF 50034 | 1466.6<br>1538.7<br>1610.8<br>1755.0<br>1827.0<br>1899.1 | 1800 | 167.9<br>210.6<br>240.0<br>251.3<br>265.4<br>251.7 | 13.5 | 304<br>327<br>334<br>347<br>385<br>363 | 252.1 |
| HABA-DEA-SF 50035 | 1465.9<br>1537.9<br>1609.9<br>1754.1<br>1826.1<br>1898.2 | 1800 | 216.9<br>258.4<br>281.4<br>274.7<br>291.6<br>283.6 | 10.4 | 316<br>349<br>354<br>355<br>362<br>352 | 282.8 |
| HABA-DEA-SF 50036 | 1466.3<br>1538.4<br>1610.5<br>1754.7<br>1826.7<br>1898.8 | 1800 | 229.2<br>245.8<br>279.3<br>286.9<br>289.4<br>278.5 | 9.8  | 365<br>340<br>345<br>364<br>349<br>359 | 283.5 |
| HABA-DEA-SF 50037 | 1465.7<br>1537.7<br>1609.7<br>1753.9                     | 1800 | 218.6<br>269.6<br>287.4<br>301.0                   | 9.6  | 323<br>357<br>350<br>368               | 296   |



|                   |                                                          |      |                                                    |      |                                        |       |
|-------------------|----------------------------------------------------------|------|----------------------------------------------------|------|----------------------------------------|-------|
|                   | 1825.9<br>1898.0                                         |      | 292.9<br>302.4                                     |      | 370<br>369                             |       |
| HABA-DEA-SF 50038 | 1466.7<br>1538.7<br>1610.7<br>1755.1<br>1827.1<br>1899.1 | 1800 | 223.5<br>252.7<br>278.9<br>298.3<br>291.3<br>302.3 | 11.3 | 341<br>342<br>361<br>361<br>361<br>396 | 292.7 |
| HABA-DEA-SF 50039 | 1466.9<br>1539.1<br>1611.1<br>1755.3<br>1827.4<br>1899.5 | 1900 | 190.4<br>216.5<br>240.4<br>256.0<br>247.1<br>247.7 | 13.7 | 292<br>289<br>298<br>330<br>319<br>339 | 247.8 |
| HABA-DEA-SF 50040 | 1466.7<br>1538.7<br>1610.8<br>1755.0<br>1827.1<br>1899.1 | 1900 | 216.2<br>246.1<br>265.6<br>284.7<br>270.6<br>271.6 | 14.5 | 323<br>331<br>360<br>360<br>346<br>345 | 273.1 |
| HABA-DEA-SF 50041 | 1466.9<br>1539.1<br>1611.2<br>1755.4<br>1827.5<br>1899.7 | 1900 | 212.0<br>242.0<br>263.6<br>269.6<br>263.3<br>258.5 | 15.1 | 296<br>315<br>312<br>316<br>316<br>315 | 263.8 |
| HABA-DEA-SF 50042 | 1467.0<br>1539.2<br>1611.2<br>1755.5<br>1827.5<br>1899.7 | 1900 | 222.6<br>240.7<br>270.8<br>272.2<br>266.1<br>269.3 | 16.6 | 320<br>310<br>322<br>333<br>330<br>328 | 269.6 |
| HABA-DEA-SF 50043 | 1466.6<br>1538.7<br>1610.8<br>1755.1<br>1827.1<br>1899.1 | 1900 | 168.9<br>191.3<br>210.3<br>229.4<br>227.5<br>220.6 | 16.6 | 279<br>301<br>310<br>330<br>318<br>324 | 221.9 |
| HABA-DEA-SF 50044 | 1466.0<br>1538.0<br>1610.1<br>1754.2<br>1826.3<br>1898.3 | 1900 | 188.7<br>205.3<br>228.8<br>238.4<br>233.5<br>238.9 | 13.7 | 316<br>310<br>324<br>342<br>334<br>352 | 234.9 |
| HABA-DEA-SF 50045 | 1466.1<br>1538.1<br>1610.1<br>1754.4<br>1826.5<br>1898.5 | 1900 | 227.8<br>259.9<br>275.6<br>293.6<br>298.5<br>281.7 | 16.7 | 327<br>324<br>327<br>348<br>365<br>345 | 287.4 |

|                   |                                                          |      |                                                    |      |                                        |                  |
|-------------------|----------------------------------------------------------|------|----------------------------------------------------|------|----------------------------------------|------------------|
| HABA-DEA-SF 50046 | 1466.7<br>1538.7<br>1610.8<br>1755.0<br>1827.0<br>1899.7 | 1900 | 176.5<br>193.9<br>213.0<br>226.0<br>221.4<br>216.2 | 16.7 | 284<br>298<br>318<br>319<br>335<br>348 | Szeroki<br>219.2 |
| HABA-DEA-SF 50047 | 1465.8<br>1537.8<br>1609.8<br>1755.0<br>1825.9<br>1898.0 | 1900 | 142.1<br>169.2<br>175.1<br>191.8<br>192.3<br>189.3 | 13.3 | 314<br>322<br>329<br>353<br>343<br>362 | 187.1            |
| HABA-DEA-SF 50048 | 1467.0<br>1539.1<br>1611.2<br>1755.5<br>1827.5<br>1899.6 | 1900 | 186.2<br>218.3<br>223.9<br>230.1<br>234.4<br>237.8 | 17.4 | 319<br>317<br>318<br>324<br>332<br>328 | 231.6            |
| HABA-DEA-SF 50049 | 1466.3<br>1538.3<br>1610.4<br>1754.5<br>1826.6<br>1898.6 | 1900 | 160.1<br>183.2<br>197.6<br>217.5<br>217.0<br>216.8 | 15.9 | 321<br>325<br>342<br>348<br>357<br>361 | 212.1            |
| HABA-DEA-SF 50050 | 1466.8<br>1539.0<br>1611.0<br>1755.3<br>1827.4<br>1899.6 | 1900 | 177.0<br>205.3<br>214.4<br>226.6<br>221.6<br>230.1 | 17.7 | 312<br>306<br>311<br>326<br>316<br>333 | 223.2            |
| HABA-DEA-SF 50051 | 1467.1<br>1539.4<br>1611.5<br>1755.7<br>1827.8<br>1899.9 | 1900 | 146.3<br>157.8<br>164.3<br>179.5<br>184.9<br>190.3 | 13.2 | 316<br>299<br>287<br>294<br>308<br>320 | 304              |
| HABA-DEA-SF 50052 | 1467.9<br>1540.1<br>1612.3<br>1756.7<br>1828.8<br>1900.9 | 2000 | 165.4<br>186.9<br>203.5<br>206.2<br>208.6<br>195.4 | 20.3 | 278<br>284<br>294<br>295<br>297<br>293 | 203.3            |
| HABA-DEA-SF 50053 | 1467.0<br>1539.1<br>1611.2<br>1755.5<br>1827.5<br>1899.7 | 2000 | 173.5<br>186.5<br>200.0<br>216.7<br>220.2<br>206.5 | 18.6 | 292<br>287<br>293<br>308<br>311<br>298 | 210.8            |
| HABA-DEA-SF 50054 | 1466.9<br>1539.0                                         | 2000 | 174.7<br>191.6                                     | 18.2 | 305<br>317                             | 222.8            |

|                   |                                                          |      |                                                    |      |                                        |        |
|-------------------|----------------------------------------------------------|------|----------------------------------------------------|------|----------------------------------------|--------|
|                   | 1611.0<br>1755.3<br>1827.4<br>1899.4                     |      | 213.2<br>220.9<br>223.4<br>233.5                   |      | 322<br>328<br>343<br>360               |        |
| HABA-DEA-SF 50055 | 1467.2<br>1539.2<br>1611.4<br>1755.6<br>1827.8<br>1899.4 | 2000 | 160.1<br>182.6<br>185.3<br>197.1<br>186.6<br>189.5 | 20.3 | 281<br>295<br>292<br>315<br>303<br>305 | 188.1  |
| HABA-DEA-SF 50056 | 1466.1<br>1538.2<br>1610.1<br>1754.5<br>1826.5<br>1898.5 | 1700 | 206.8<br>236.7<br>265.3<br>299.5<br>266.2<br>268.7 | 3.7  | 328<br>326<br>335<br>384<br>365<br>370 | 274.9  |
| HABA-DEA-SF 50057 | 1466.0<br>1538.2<br>1610.1<br>1754.4<br>1826.3<br>1898.5 | 1700 | 216.4<br>238.1<br>250.4<br>269.6<br>257.4<br>252.9 | 4.4  | 344<br>349<br>334<br>350<br>375<br>359 | 257.61 |
| HABA-DEA-SF 50058 | 1466.6<br>1538.5<br>1610.6<br>1754.8<br>1826.8<br>1898.9 | 1700 | 131.3<br>175.0<br>183.3<br>191.3<br>190.5<br>194.5 | 7.1  | 317<br>348<br>343<br>363<br>371<br>385 | 189.9  |
| HABA-DEA-SF 50059 | 1466.4<br>1538.4<br>1610.5<br>1754.9<br>1827.0<br>1899.1 | 1700 | 148.4<br>183.4<br>199.5<br>224.5<br>206.7<br>218.5 | 6.7  | 317<br>327<br>312<br>342<br>344<br>343 | 212.3  |
| HABA-DEA-SF 50060 | 1467.0<br>1539.3<br>1611.2<br>1755.6<br>1827.7<br>1899.7 | 1700 | 151.6<br>172.0<br>197.9<br>229.3<br>203.9<br>180.1 | 6.4  | 337<br>303<br>341<br>374<br>359<br>334 | 210.4  |
| HABA-DEA-SF 50061 | 1466.9<br>1539.1<br>1611.1<br>1755.5<br>1827.5<br>1899.6 | 1800 | 256.1<br>278.9<br>310.8<br>304.6<br>347.3<br>311.7 | 8.8  | 345<br>328<br>345<br>359<br>379<br>367 | 318.6  |
| HABA-DEA-SF 50062 | 1467.5<br>1539.6<br>1611.7<br>1756.1                     | 1800 | 213.7<br>233.1<br>262.9<br>269.8                   | 9.1  | 278<br>275<br>292<br>288               | 269.8  |

|                   |                                                          |      |                                                    |      |                                        |        |
|-------------------|----------------------------------------------------------|------|----------------------------------------------------|------|----------------------------------------|--------|
|                   | 1828.2<br>1900.3                                         |      | 286.0<br>260.3                                     |      | 308<br>297                             |        |
| HABA-DEA-SF 50063 | 1466.7<br>1538.8<br>1610.8<br>1755.1<br>1827.3<br>1899.3 | 1800 | 181.4<br>198.4<br>218.8<br>248.9<br>237.3<br>246.1 | 9.7  | 300<br>295<br>292<br>311<br>308<br>307 | 237.8  |
| HABA-DEA-SF 50064 | 1467.3<br>1539.4<br>1611.4<br>1755.8<br>1827.9<br>1899.9 | 1800 | 143.8<br>168.9<br>185.4<br>190.8<br>200.8<br>203.5 | 10.2 | 272<br>288<br>302<br>307<br>305<br>311 | 195.1  |
| HABA-DEA-SF 50065 | 1468.5<br>1540.7<br>1612.8<br>1757.3<br>1829.3<br>1901.6 | 1900 | 172.4<br>188.5<br>204.0<br>228.7<br>240.4<br>234.3 | 15.5 | 303<br>316<br>317<br>329<br>341<br>337 | 226.9  |
| HABA-DEA-SF 50066 | 1468.1<br>1540.3<br>1612.5<br>1756.8<br>1829.0<br>1901.1 | 1900 | 262.6<br>288.5<br>317.0<br>327.6<br>325.1<br>331.9 | 13.0 | 330<br>332<br>335<br>337<br>345<br>347 | 325.4  |
| HABA-DEA-SF 50067 | 1467.7<br>1540.0<br>1612.1<br>1756.4<br>1828.6<br>1901.1 | 1900 | 198.8<br>220.5<br>242.1<br>268.8<br>273.6<br>258.9 | 13.8 | 290<br>286<br>291<br>303<br>318<br>303 | 260.9  |
| HABA-DEA-SF 50068 | 1467.2<br>1540.0<br>1611.5<br>1755.8<br>1827.8<br>1899.9 | 1900 | 146.1<br>158.7<br>168.3<br>187.4<br>177.2<br>185.0 | 10.2 | 293<br>295<br>286<br>293<br>305<br>318 | 179.5  |
| HABA-DEA-SF 50069 | 1469.6<br>1542.0<br>1614.1<br>1758.5<br>1830.9<br>1903.1 | 2000 | 131.0<br>147.8<br>141.5<br>169.1<br>166.8<br>159.9 | 20.3 | 246<br>245<br>250<br>273<br>268<br>278 | 165.31 |
| HABA-DEA-SF 50070 | 1469.3<br>1541.5<br>1613.8<br>1758.2<br>1830.6<br>1902.8 | 2000 | 143.6<br>164.7<br>168.9<br>181.3<br>189.2<br>177.2 | 21.6 | 264<br>283<br>277<br>280<br>293<br>288 | 179.2  |

|                   |                                                          |      |                                                    |      |                                        |       |
|-------------------|----------------------------------------------------------|------|----------------------------------------------------|------|----------------------------------------|-------|
| HABA-DEA-SF 50071 | 1467.9<br>1540.0<br>1612.2<br>1756.6<br>1828.8<br>1900.9 | 2000 | 175.1<br>206.6<br>212.0<br>239.9<br>236.2<br>233.2 | 17.7 | 271<br>289<br>277<br>297<br>293<br>294 | 225.6 |
| HABA-DEA-SF 50072 | 1465.6<br>1537.7<br>1609.7<br>1753.8<br>1826.0<br>1900.9 | 1700 | 181.2<br>211.4<br>234.4<br>264.0<br>231.9<br>228.4 | 3.6  | 353<br>348<br>360<br>393<br>366<br>334 | 239.7 |
| HABA-DEA-SF 50073 | 1466.6<br>1538.7<br>1610.8<br>1755.1<br>1827.1<br>1899.3 | 1700 | 218.9<br>223.3<br>249.3<br>256.3<br>250.8<br>263.6 | 4.1  | 355<br>325<br>343<br>348<br>385<br>363 | 255   |
| HABA-DEA-SF 50074 | 1466.2<br>1538.3<br>1610.3<br>1754.5<br>1826.5<br>1898.6 | 1700 | 173.3<br>198.0<br>207.2<br>249.6<br>233.3<br>226.2 | 6.8  | 338<br>339<br>321<br>374<br>345<br>378 | 229.1 |
| HABA-DEA-SF 50075 | 1466.3<br>1538.3<br>1610.5<br>1754.7<br>1826.8<br>1899.0 | 1700 | 192.6<br>217.5<br>214.0<br>226.4<br>215.1<br>217.7 | 4.5  | 274<br>300<br>274<br>309<br>292<br>317 | 218.1 |
| HABA-DEA-SF 50076 | 1467.0<br>1539.0<br>1611.2<br>1755.4<br>1827.4<br>1899.6 | 1800 | 168.0<br>205.4<br>215.2<br>234.2<br>230.4<br>241.4 | 8.4  | 295<br>338<br>315<br>328<br>329<br>337 | 230.3 |
| HABA-DEA-SF 50077 | 1467.1<br>1539.3<br>1611.4<br>1755.7<br>1827.8<br>1899.9 | 1800 | 159.8<br>212.0<br>206.5<br>224.3<br>232.4<br>221.1 | 11.2 | 293<br>354<br>316<br>333<br>352<br>343 | 219.3 |
| HABA-DEA-SF 50078 | 1467.2<br>1539.5<br>1611.6<br>1755.8<br>1827.9<br>1900.0 | 1900 | 135.0<br>162.0<br>174.7<br>199.3<br>193.1<br>195.3 | 9.1  | 306<br>321<br>310<br>338<br>338<br>346 | 190.6 |
| HABA-DEA-SF 50079 | 1467.3<br>1539.5                                         | 1800 | 174.0<br>210.4                                     | 9.1  | 309<br>317                             | 240.4 |

|                   |                                                          |      |                                                    |      |                                        |       |
|-------------------|----------------------------------------------------------|------|----------------------------------------------------|------|----------------------------------------|-------|
|                   | 1611.6<br>1755.9<br>1828.1<br>1900.2                     |      | 234.2<br>258.0<br>247.7<br>251.6                   |      | 322<br>337<br>336<br>330               |       |
| HABA-DEA-SF 50080 | 1466.9<br>1539.1<br>1611.6<br>1755.5<br>1827.5<br>1899.7 | 1800 | 265.1<br>295.6<br>313.7<br>318.9<br>304.3<br>301.5 | 9.5  | 307<br>335<br>327<br>326<br>324<br>321 | 306.8 |
| HABA-DEA-SF 50081 | 1466.1<br>1538.2<br>1610.2<br>1754.3<br>1826.3<br>1898.6 | 1800 | 144.4<br>162.6<br>188.4<br>193.4<br>200.8<br>188.6 | 10.0 | 290<br>309<br>324<br>333<br>336<br>333 | 192.8 |
| HABA-DEA-SF 50082 | 1467.9<br>1540.1<br>1612.2<br>1756.6<br>1828.8<br>1900.9 | 1900 | 180.5<br>222.4<br>234.8<br>238.5<br>253.6<br>250.8 | 15.1 | 318<br>326<br>344<br>327<br>353<br>349 | 240.0 |
| HABA-DEA-SF 50083 | 1468.5<br>1540.8<br>1612.9<br>1757.4<br>1829.5<br>1901.7 | 1900 | 143.8<br>161.5<br>185.7<br>191.1<br>191.1<br>209.2 | 14.4 | 287<br>298<br>310<br>312<br>311<br>315 | 194.3 |
| HABAdea 50084     | 1467.2<br>1539.4<br>1611.5<br>1755.8<br>1827.9<br>1900.0 | 1900 | 230.7<br>262.1<br>288.9<br>302.3<br>286.8<br>289.4 | 15.0 | 312<br>309<br>322<br>327<br>314<br>327 | 285.9 |
| HABA-DEA-SF 50085 | 1466.8<br>1539.0<br>1611.1<br>1755.3<br>1827.4<br>1900.0 | 1900 | 160.1<br>182.9<br>206.1<br>212.2<br>217.2<br>218.3 | 17.7 | 325<br>329<br>329<br>343<br>338<br>345 | 213.5 |
| HABA-DEA-SF 50086 | 1468.9<br>1541.2<br>1613.3<br>1757.7<br>1830.1<br>1902.2 | 2000 | 162.8<br>183.0<br>188.9<br>211.5<br>210.7<br>199.6 | 17.5 | 267<br>274<br>283<br>289<br>286<br>290 | 207.3 |
| HABA-DEA-SF 50087 | 1469.1<br>1541.1<br>1613.5<br>1758.0                     | 2000 | 128.9<br>143.9<br>151.3<br>171.7                   | 16.6 | 262<br>275<br>264<br>282               | 169.8 |

|                    |                                                          |      |                                                    |      |                                        |       |
|--------------------|----------------------------------------------------------|------|----------------------------------------------------|------|----------------------------------------|-------|
|                    | 1830.1<br>1902.3                                         |      | 180.3<br>175.7                                     |      | 290<br>296                             |       |
| HABA-DEA-SF 50088  | 1467.8<br>1539.9<br>1612.1<br>1756.4<br>1828.6<br>1900.8 | 2000 | 201.3<br>227.4<br>243.9<br>249.7<br>246.0<br>234.6 | 22.3 | 275<br>278<br>293<br>300<br>299<br>292 | 233.8 |
| HABA-DEA-SF 50089  | 1467.3<br>1539.5<br>1611.7<br>1756.0<br>1828.1<br>1900.1 | 2000 | 149.4<br>167.6<br>181.3<br>192.0<br>189.6<br>182.1 | 20.8 | 261<br>283<br>285<br>303<br>310<br>302 | 186.3 |
| HABA-DEA-SF 100001 | 1465.2<br>1537.0<br>1609.1<br>1753.1<br>1825.1<br>1897.0 | 1500 | 176.6<br>242.2<br>247.7<br>225.8<br>244.7<br>264.3 | 2.4  | 378<br>437<br>438<br>407<br>391<br>468 | 244.9 |
| HABA-DEA-SF 100002 | 1465.2<br>1537.0<br>1609.1<br>1753.1<br>1825.1<br>1896.8 | 1500 | 94.0<br>103.7<br>122.1<br>93.9<br>129.6<br>117.6   | 0.8  | 306<br>319<br>316<br>281<br>330<br>338 | 118.3 |
| HABA-DEA-SF 100005 | 1465.1<br>1537.1<br>1609.2<br>1753.3<br>1825.3<br>1897.2 | 1700 | 233.2<br>253.5<br>279.6<br>296.8<br>318.9<br>298.8 | 6.4  | 393<br>379<br>363<br>375<br>391<br>386 | 289.5 |
| HABA-DEA-SF 100006 | 1465.5<br>1537.5<br>1609.6<br>1753.8<br>1825.7<br>1897.8 | 1600 | 230.1<br>221.5<br>252.1<br>322.5<br>297.0<br>325.6 | 4.0  | 372<br>338<br>346<br>419<br>408<br>404 | 274.8 |
| HABA-DEa-SF 100007 | 1465.0<br>1536.9<br>1609.1<br>1753.2<br>1825.2<br>1897.2 | 1600 | 183.5<br>249.5<br>253.2<br>255.5<br>249.4<br>272.3 | 3.7  | 349<br>400<br>338<br>359<br>377<br>409 | 255.9 |
| HABA-DEA-SF 100008 | 1465.2<br>1537.4<br>1609.2<br>1753.5<br>1825.6<br>1897.6 | 1600 | 156.0<br>186.0<br>242.8<br>223.6<br>240.9<br>247.0 | 3.9  | 290<br>321<br>351<br>336<br>360<br>381 | 238.6 |

|                    |                                                          |      |                                                    |     |                                        |       |
|--------------------|----------------------------------------------------------|------|----------------------------------------------------|-----|----------------------------------------|-------|
| HABA-DEA-SF 100009 | 1466.1<br>1538.1<br>1610.0<br>1754.4<br>1826.4<br>1898.4 | 1600 | 173.2<br>183.7<br>201.6<br>227.5<br>211.3<br>186.1 | 3.5 | 324<br>298<br>323<br>354<br>357<br>337 | 213.5 |
| HABA-DEA-SF 100010 | 1465.8<br>1537.8<br>1609.8<br>1754.0<br>1826.0<br>1898.0 | 1700 | 246.2<br>290.1<br>333.1<br>336.7<br>323.0<br>334.7 | 7.9 | 337<br>341<br>350<br>360<br>360<br>369 | 310.5 |
| HABA-DEA-SF 100011 | 1465.3<br>1537.3<br>1609.4<br>1753.5<br>1825.5<br>1897.6 | 1700 | 199.1<br>237.9<br>250.5<br>266.3<br>279.1<br>268.3 | 6.2 | 344<br>363<br>367<br>388<br>391<br>373 | 260.4 |
| HABA-DEA-SF 100012 | 1465.7<br>1537.9<br>1609.9<br>1754.1<br>1826.2<br>1898.2 | 1700 | 209.3<br>231.3<br>241.1<br>261.5<br>244.2<br>239.6 | 6.4 | 291<br>288<br>287<br>305<br>287<br>303 | 243.5 |
| HABA-DEa-SF 100013 | 1465.6<br>1537.6<br>1609.8<br>1753.9<br>1825.8<br>1897.9 | 1700 | 236.1<br>266.7<br>292.0<br>295.3<br>318.3<br>300.8 | 6.6 | 349<br>370<br>361<br>352<br>380<br>366 | 294.6 |
| HABA-DEa-SF 100014 | 1466.3<br>1538.4<br>1610.5<br>1754.6<br>1826.8<br>1898.8 | 1700 | 254.6<br>293.5<br>331.6<br>331.2<br>320.4<br>344.5 | 8.7 | 356<br>346<br>353<br>352<br>345<br>366 | 324.2 |
| HABA-DEA-SF 100015 | 1466.4<br>1538.5<br>1610.6<br>1754.7<br>1826.9<br>1899.1 | 1700 | 213.8<br>267.8<br>274.3<br>287.0<br>282.1<br>296.1 | 9.7 | 276<br>304<br>294<br>313<br>317<br>315 | 281.5 |
| HABA-DEA-SF 100016 | 1465.3<br>1537.3<br>1609.3<br>1753.5<br>1825.5<br>1897.6 | 1700 | 223.0<br>256.5<br>283.3<br>303.7<br>294.1<br>291.3 | 7.6 | 315<br>334<br>334<br>362<br>358<br>358 | 293.1 |
| HABA-DEA-SF 100017 | 1465.2<br>1537.3                                         | 1700 | 242.5<br>271.6                                     | 7.8 | 323<br>347                             | 289.6 |



|                    |                                                          |      |                                                    |     |                                        |       |
|--------------------|----------------------------------------------------------|------|----------------------------------------------------|-----|----------------------------------------|-------|
|                    | 1609.2<br>1753.3<br>1825.4<br>1897.3                     |      | 303.5<br>293.4<br>320.5<br>305.9                   |     | 317<br>347<br>354<br>364               |       |
| HABA-DEA-SF 100018 | 1466.0<br>1538.0<br>1610.0<br>1754.2<br>1826.3<br>1898.4 | 1700 | 209.5<br>224.6<br>241.6<br>281.1<br>284.8<br>262.0 | 6.3 | 329<br>332<br>334<br>364<br>361<br>364 | 258.8 |
| HABA-DEA-SF 100019 | 1467.5<br>1537.8<br>1609.8<br>1753.9<br>1826.1<br>1898.1 | 1700 | 148.7<br>177.5<br>207.2<br>227.9<br>208.0<br>225.8 | 4.3 | 326<br>308<br>347<br>355<br>354<br>376 | 217.2 |
| HABA-DEa-SF 100020 | 1465.8<br>1537.8<br>1610.0<br>1754.0<br>1826.1<br>1898.3 | 1700 | 158.6<br>185.1<br>208.8<br>253.5<br>228.2<br>241.4 | 4.5 | 347<br>362<br>355<br>371<br>363<br>358 | 232.9 |
| HABA-DEA-SF 100021 | 1465.6<br>1537.6<br>1609.7<br>1753.7<br>1825.9<br>1897.9 | 1700 | 177.7<br>196.2<br>223.0<br>239.2<br>250.1<br>268.4 | 5.5 | 311<br>328<br>338<br>344<br>348<br>373 | 235.4 |
| HABA-DEA-SF 100022 | 1465.3<br>1537.3<br>1609.3<br>1753.5<br>1825.5<br>1897.6 | 1700 | 186.2<br>189.9<br>228.3<br>224.9<br>224.0<br>235.3 | 6.0 | 335<br>314<br>338<br>340<br>359<br>349 | 228.1 |
| HABA-DEA-SF 100023 | 1465.4<br>1537.6<br>1609.6<br>1753.6<br>1825.7<br>1897.8 | 1700 | 196.2<br>226.1<br>236.4<br>269.7<br>265.5<br>261.1 | 7.1 | 336<br>333<br>333<br>374<br>367<br>364 | 251.8 |
| HABA-DEA-SF 100024 | 1465.7<br>1537.8<br>1609.8<br>1754.0<br>1826.0<br>1898.0 | 1700 | 195.1<br>218.3<br>255.3<br>264.9<br>249.4<br>254.2 | 8.3 | 318<br>316<br>318<br>349<br>331<br>348 | 248.4 |
| HABA-DEA-SF 100028 | 1465.4<br>1537.5<br>1609.4<br>1753.6                     | 1700 | 208.4<br>248.7<br>254.3<br>265.9                   | 7.4 | 318<br>337<br>327<br>338               | 260.3 |

|                    |                                                          |      |                                                    |      |                                        |       |
|--------------------|----------------------------------------------------------|------|----------------------------------------------------|------|----------------------------------------|-------|
|                    | 1825.6<br>1897.6                                         |      | 261.3<br>271.5                                     |      | 349<br>360                             |       |
| HABA-DEA-SF 100025 | 1465.3<br>1537.4<br>1609.3<br>1753.4<br>1825.4<br>1897.4 | 1700 | 196.1<br>243.0<br>246.2<br>277.6<br>238.8<br>267.1 | 7.5  | 328<br>345<br>356<br>372<br>383<br>369 | 254.5 |
| HABA-DEA-SF 100026 | 1465.2<br>1537.3<br>1609.3<br>1753.5<br>1825.3<br>1897.5 | 1700 | 201.6<br>233.2<br>255.5<br>251.8<br>300.2<br>281.9 | 6.3  | 337<br>342<br>338<br>343<br>385<br>389 | 264.5 |
| HABA-DEA-SF 100027 | 1465.7<br>1537.8<br>1609.8<br>1754.0<br>1825.9<br>1898.0 | 1700 | 195.7<br>241.8<br>252.5<br>269.5<br>267.8<br>265.2 | 9.1  | 323<br>348<br>316<br>338<br>345<br>358 | 259.4 |
| HABA-DEA-SF 100029 | 1465.2<br>1537.0<br>1609.2<br>1754.0<br>1825.2<br>1897.3 | 1700 | 191.4<br>224.8<br>232.6<br>253.3<br>284.9<br>252.7 | 6.8  | 331<br>352<br>338<br>355<br>386<br>356 | 249.7 |
| HABA-DEA-SF 100030 | 1465.5<br>1537.6<br>1609.6<br>1753.7<br>1825.7<br>1897.7 | 1800 | 186.7<br>214.2<br>232.8<br>280.3<br>251.0<br>258.7 | 10.8 | 288<br>280<br>283<br>313<br>311<br>318 | 255.7 |
| HABA-DEA-SF 100031 | 1466.5<br>1538.5<br>1610.6<br>1755.1<br>1826.8<br>1899.2 | 1800 | 171.0<br>198.4<br>209.1<br>228.6<br>239.1<br>243.6 | 7.1  | 281<br>285<br>287<br>291<br>311<br>315 | 230.1 |
| HABA-DEA-SF 100032 | 1465.7<br>1537.9<br>1609.9<br>1754.0<br>1826.1<br>1898.1 | 1800 | 204.5<br>240.2<br>239.4<br>270.9<br>280.0<br>256.4 | 6.9  | 354<br>349<br>330<br>362<br>371<br>361 | 257.4 |
| HABA-DEA-SF 100033 | 1466.3<br>1538.2<br>1610.2<br>1754.5<br>1826.5<br>1898.6 | 1800 | 206.9<br>244.2<br>260.8<br>300.6<br>278.4<br>260.8 | 7.6  | 307<br>321<br>320<br>363<br>353<br>335 | 268.9 |

|                    |                                                          |      |                                                    |      |                                          |       |
|--------------------|----------------------------------------------------------|------|----------------------------------------------------|------|------------------------------------------|-------|
| HABA-DEA-SF 100034 | 1467.3<br>1539.3<br>1611.5<br>1755.6<br>1827.9<br>1900.0 | 1800 | 137.5<br>153.3<br>175.8<br>193.7<br>191.0<br>177.2 | 5.4  | 261<br>272<br>302<br>308<br>287<br>283   | 184.4 |
| HABA-DEA-SF 100035 | 1467.0<br>1539.1<br>1611.3<br>1755.6<br>1827.8<br>1899.8 | 1800 | 173.1<br>201.6<br>211.3<br>232.9<br>220.9<br>221.3 | 8.4  | 242<br>253<br>249<br>259<br>252<br>253   | 221.6 |
| HABA-DEa-SF 100036 | 1465.5<br>1537.5<br>1609.5<br>1753.6<br>1825.6<br>1897.7 | 1800 | 204.0<br>228.1<br>257.6<br>256.9<br>265.2<br>268.2 | 11.8 | 289<br>309<br>311<br>316<br>330<br>342   | 255.2 |
| HABA-DEA-SF 100037 | 1466.5<br>1538.7<br>1610.7<br>1755.1<br>1827.1<br>1899.2 | 1800 | 213.5<br>230.9<br>262.5<br>276.5<br>271.4<br>272.8 | 11.7 | 213.5<br>270<br>284<br>303<br>308<br>298 | 270.8 |
| HABA-DEA-SF 100038 | 1465.4<br>1537.5<br>1609.5<br>1753.6<br>1825.5<br>1897.5 | 1800 | 206.7<br>233.4<br>258.6<br>270.6<br>263.2<br>261.3 | 11.1 | 324<br>329<br>360<br>366<br>352<br>363   | 263.4 |
| HABA-DEA-SF 100039 | 1465.7<br>1537.7<br>1609.8<br>1754.0<br>1825.9<br>1898.0 | 1800 | 218.2<br>275.1<br>279.1<br>312.0<br>307.3<br>297.3 | 12.4 | 315<br>353<br>336<br>349<br>356<br>359   | 240.2 |
| HABA-DEA-SF 100040 | 1465.6<br>1537.6<br>1609.6<br>1753.8<br>1825.7<br>1897.8 | 1800 | 197.6<br>227.9<br>245.6<br>265.8<br>264.1<br>268.1 | 11.6 | 319<br>327<br>313<br>337<br>339<br>359   | 260.9 |
| HABA-DEa-SF 100041 | 1465.3<br>1537.3<br>1609.2<br>1753.5<br>1825.4<br>1897.4 | 1800 | 215.7<br>267.0<br>277.1<br>283.0<br>288.0<br>286.1 | 10.8 | 324<br>353<br>347<br>350<br>360<br>362   | 280.2 |
| HABA-DEA-SF 100042 | 1465.8<br>1537.9                                         | 1800 | 202.4<br>233.5                                     | 11.5 | 296<br>321                               | 274.9 |

|                      |                                                          |      |                                                    |      |                                        |       |
|----------------------|----------------------------------------------------------|------|----------------------------------------------------|------|----------------------------------------|-------|
|                      | 1609.9<br>1754.1<br>1826.1<br>1898.1                     |      | 260.8<br>275.0<br>282.1<br>282.0                   |      | 319<br>341<br>349<br>356               |       |
| HABA-DEA – SF 100043 | 1465.5<br>1537.6<br>1609.7<br>1753.8<br>1825.8<br>1897.9 | 1800 | 214.5<br>235.2<br>264.7<br>278.8<br>266.5<br>270.5 | 13.2 | 303<br>302<br>312<br>318<br>335<br>329 | 270.1 |
| HABA-DEA-SF 100044   | 1465.3<br>1537.3<br>1609.3<br>1753.5<br>1825.4<br>1897.5 | 1800 | 237.5<br>281.6<br>317.8<br>313.0<br>319.0<br>319.2 | 7.4  | 285<br>305<br>305<br>305<br>310<br>325 | 317.3 |
| HABA-DEA-SF 100045   | 1465.4<br>1537.2<br>1609.4<br>1753.5<br>1825.5<br>1897.4 | 1800 | 192.7<br>233.4<br>241.7<br>270.5<br>267.0<br>261.9 | 7.4  | 270<br>293<br>288<br>303<br>308<br>299 | 260.3 |
| HABA-DEA-SF 100046   | 1467.0<br>1539.0<br>1611.2<br>1755.4<br>1827.5<br>1899.6 | 1800 | 190.5<br>229.0<br>239.5<br>262.2<br>252.5<br>238.9 | 12.5 | 285<br>302<br>285<br>303<br>304<br>302 | 248.3 |
| HABA-DEA-SF 100047   | 1466.3<br>1538.4<br>1610.3<br>1754.7<br>1826.6<br>1898.8 | 1800 | 179.2<br>201.1<br>224.8<br>234.7<br>248.1<br>245.5 | 16.6 | 273<br>276<br>289<br>298<br>315<br>313 | 238.3 |
| HABA-DEA-SF 100048   | 1465.9<br>1538.1<br>1610.2<br>1754.4<br>1826.3<br>1898.4 | 1900 | 199.6<br>225.5<br>241.8<br>265.0<br>254.7<br>259.4 | 17.0 | 289<br>303<br>306<br>333<br>325<br>333 | 255.2 |
| HABA-DEA-SF 100049   | 1465.6<br>1537.7<br>1609.8<br>1753.9<br>1826.0<br>1897.9 | 1900 | 207.6<br>238.7<br>261.1<br>265.9<br>270.4<br>274.1 | 15.0 | 306<br>310<br>322<br>325<br>343<br>341 | 267.9 |
| HABA-DEA-SF 100050   | 1465.5<br>1537.7<br>1609.6<br>1753.8                     | 1900 | 207.0<br>239.8<br>241.0<br>264.3                   | 15.5 | 306<br>319<br>318<br>325               | 254.8 |

|                    |                                                          |      |                                                    |      |                                        |       |
|--------------------|----------------------------------------------------------|------|----------------------------------------------------|------|----------------------------------------|-------|
|                    | 1825.8<br>1897.8                                         |      | 269.3<br>259.4                                     |      | 334<br>325                             |       |
| HABA-DEA-SF 100051 | 1465.4<br>1537.4<br>1609.5<br>1753.6<br>1825.7<br>1897.7 | 1900 | 194.9<br>217.3<br>246.1<br>259.3<br>254.6<br>258.0 | 14.7 | 295<br>289<br>303<br>317<br>312<br>327 | 254.5 |
| HABA-DEA-SF 100052 | 1466.4<br>1538.5<br>1610.4<br>1754.8<br>1826.9<br>1899.0 | 1900 | 153.0<br>173.8<br>182.5<br>196.0<br>210.5<br>208.7 | 11.6 | 239<br>258<br>243<br>259<br>263<br>270 | 199.4 |
| HABA-DEA-SF 100053 | 1466.3<br>1538.3<br>1610.4<br>1754.6<br>1826.6<br>1898.6 | 1900 | 176.2<br>198.8<br>224.9<br>236.2<br>235.1<br>226.8 | 12.5 | 280<br>295<br>308<br>318<br>322<br>328 | 224.4 |
| HABA-DEA-SF 100054 | 1467.9<br>1539.9<br>1612.0<br>1756.4<br>1828.6<br>1900.8 | 1900 | 152.1<br>185.1<br>191.6<br>210.4<br>212.9<br>210.3 | 10.8 | 291<br>309<br>304<br>302<br>330<br>327 | 206.3 |
| HABA-DEA-SF 100055 | 1465.7<br>1537.9<br>1609.9<br>1754.0<br>1826.1<br>1898.2 | 1900 | 171.6<br>195.2<br>205.6<br>225.1<br>213.8<br>205.1 | 13.8 | 278<br>288<br>289<br>300<br>296<br>283 | 212.4 |
| HABA-DEA-SF 100056 | 1467.2<br>1539.4<br>1611.5<br>1755.7<br>1828.0<br>1900.0 | 1900 | 172.3<br>191.3<br>219.2<br>235.5<br>233.5<br>232.1 | 18.5 | 291<br>294<br>294<br>315<br>314<br>324 | 230.1 |
| HABA-DEA-SF100057  | 1466.4<br>1538.5<br>1610.6<br>1754.9<br>1826.8<br>1898.9 | 1900 | 174.2<br>215.7<br>225.4<br>235.4<br>233.3<br>235.9 | 17.9 | 264<br>288<br>290<br>294<br>305<br>304 | 229.1 |
| HABA-DEA-SF 100058 | 1465.9<br>1538.0<br>1610.0<br>1754.1<br>1826.2<br>1898.2 | 1900 | 178.2<br>197.7<br>225.8<br>238.6<br>230.5<br>233.1 | 13.8 | 261<br>274<br>280<br>287<br>295<br>305 | 232   |

|                    |                                                          |      |                                                    |      |                                        |       |
|--------------------|----------------------------------------------------------|------|----------------------------------------------------|------|----------------------------------------|-------|
| HABA-DEA-SF 100059 | 1466.6<br>1538.8<br>1610.8<br>1755.1<br>1827.2<br>1899.3 | 1900 | 165.2<br>184.2<br>192.6<br>206.7<br>211.6<br>204.9 | 16.3 | 289<br>288<br>297<br>310<br>312<br>314 | 203.9 |
| HABA-DEA-SF 100060 | 1465.7<br>1537.7<br>1609.8<br>1754.0<br>1826.1<br>1898.0 | 1900 | 211.7<br>238.8<br>264.4<br>279.8<br>283.1<br>274.2 | 10.7 | 316<br>320<br>331<br>346<br>347<br>349 | 275.4 |
| HABA-DEA-SF 100061 | 1465.3<br>1537.3<br>1609.4<br>1753.5<br>1825.5<br>1897.5 | 1900 | 187.8<br>224.5<br>230.2<br>255.1<br>241.8<br>239.9 | 16.3 | 302<br>318<br>315<br>340<br>331<br>346 | 238.3 |
| HABA-DEA-SF 100062 | 1466.8<br>1538.9<br>1611.1<br>1755.4<br>1827.4<br>1899.6 | 2000 | 154.8<br>172.9<br>188.4<br>194.5<br>191.7<br>202.1 | 18.4 | 283<br>283<br>292<br>297<br>302<br>313 | 194.2 |
| HABA-DEA-SF 100063 | 1467.7<br>1539.9<br>1612.1<br>1756.4<br>1828.7<br>1900.8 | 2000 | 196.8<br>219.9<br>233.8<br>251.2<br>263.0<br>243.2 | 15.0 | 282<br>295<br>286<br>303<br>320<br>304 | 247.8 |
| HABA-DEA-SF 100064 | 1468.2<br>1540.3<br>1612.6<br>1757.0<br>1829.1<br>1901.3 | 2000 | 167.1<br>194.1<br>206.0<br>218.6<br>208.7<br>204.3 | 17.5 | 280<br>291<br>288<br>303<br>296<br>307 | 206.3 |
| HABA-DEA-SF 100065 | 1466.8<br>1538.8<br>1610.9<br>1755.2<br>1827.2<br>1899.3 | 2000 | 168.4<br>188.7<br>199.3<br>210.0<br>220.4<br>203.9 | 18.0 | 310<br>301<br>297<br>326<br>335<br>315 | 204.5 |
| HABA-DEA-SF 100066 | 1467.6<br>1539.7<br>1612.0<br>1756.2<br>1828.5<br>1900.7 | 2000 | 147.4<br>159.0<br>171.9<br>178.0<br>184.9<br>174.0 | 16.3 | 226<br>241<br>221<br>236<br>235<br>230 | 177.2 |
| HABA-DEA-SF 100067 | 1467.8<br>1540.0                                         | 2000 | 154.0<br>167.7                                     | 20.4 | 265<br>276                             | 185.8 |

|                    |                                                          |      |                                                    |      |                                        |       |
|--------------------|----------------------------------------------------------|------|----------------------------------------------------|------|----------------------------------------|-------|
|                    | 1612.1<br>1756.6<br>1828.7<br>1900.9                     |      | 177.5<br>185.5<br>191.6<br>188.8                   |      | 270<br>277<br>282<br>288               |       |
| HABA-DEA-SF 100068 | 1466.1<br>1538.3<br>1610.3<br>1754.6<br>1826.6<br>1898.7 | 2000 | 168.8<br>186.0<br>197.5<br>203.5<br>215.8<br>201.1 | 18.1 | 299<br>300<br>299<br>304<br>321<br>322 | 204.5 |
| HABA-DEA-SF 100069 | 1466.4<br>1538.5<br>1610.6<br>1754.9<br>1826.9<br>1899.0 | 2000 | 163.9<br>178.1<br>189.9<br>187.8<br>193.2<br>186.7 | 17.3 | 270<br>277<br>269<br>273<br>284<br>290 | 189.4 |
| HABA-DEA-SF 100070 | 1466.1<br>1538.2<br>1610.2<br>1754.5<br>1826.4<br>1898.6 | 2000 | 179.4<br>199.1<br>216.6<br>214.9<br>221.6<br>215.8 | 21.3 | 300<br>311<br>320<br>305<br>338<br>328 | 213.6 |
| HABA-DEA-SF 100071 | 1466.4<br>1538.4<br>1610.6<br>1754.9<br>1827.0<br>1899.1 | 2000 | 172.0<br>190.5<br>200.5<br>214.7<br>217.5<br>210.4 | 18.7 | 309<br>298<br>315<br>317<br>314<br>325 | 210.8 |
| HABA-DEA-SF 100072 | 1467.2<br>1539.4<br>1611.6<br>1755.8<br>1828.0<br>1900.1 | 2000 | 153.0<br>181.8<br>191.1<br>201.4<br>219.3<br>205.6 | 17.6 | 260<br>273<br>269<br>272<br>292<br>284 | 204.4 |

**Table S-3. The data described of S/N of PLLA used DHB-DEA matrix by DD method**

| <b>Dried Droplet<br/>DHB-DEA-PLLA<br/>C-polymer(0.1g/ml)<br/>C-matrix(0.25g/ml)</b> | Selected<br>peak           | Laser | S/N                     | RMS<br>noise | Resolution<br>FW/HM,<br>50% | Average<br>S/N |
|-------------------------------------------------------------------------------------|----------------------------|-------|-------------------------|--------------|-----------------------------|----------------|
| DHB-DEA-DD 0001                                                                     | 1465.5<br>1537.5<br>1609.5 | 2300  | 400.7<br>419.7<br>409.5 | 6.8          | 335<br>322<br>338           | 409.9          |
| DHB-DEA-DD 0002                                                                     | 1465.9<br>1538.0<br>1609.9 | 2300  | 327.1<br>325.5<br>326.8 | 6.4          | 322<br>318<br>337           | 326.5          |
| DHB-DEA-DD 0003                                                                     | 1465.4<br>1537.3<br>1609.3 | 2300  | 628.1<br>615.4<br>543.3 | 8.2          | 346<br>339<br>340           | 595.6          |
| DHB-DEA-DD 0004                                                                     | 1465.7<br>1537.7<br>1609.8 | 2300  | 567.6<br>580.0<br>549.4 | 9.0          | 349<br>351<br>356           | 565.7          |
| DHB-DEA-DD 0005                                                                     | 1465.7<br>1537.8<br>1609.8 | 2300  | 528.0<br>508.3<br>471.4 | 7.8          | 341<br>338<br>329           | 502.6          |
| DHB-DEA-DD 0006                                                                     | 1465.8<br>1537.9<br>1609.8 | 2300  | 551.8<br>539.6<br>505.6 | 9.3          | 342<br>338<br>345           | 532.2          |
| DHB-DEA-DD 0007                                                                     | 1466.0<br>1538.1<br>1610.0 | 2300  | 374.0<br>379.0<br>352.4 | 9.2          | 330<br>329<br>345           | 368.5          |
| DHB-DEA-DD 0008                                                                     | 1465.5<br>1537.5<br>1609.4 | 2300  | 630.2<br>618.8<br>604.4 | 9.6          | 351<br>354<br>358           | 617.8          |
| DHB-DEA-DD 0009                                                                     | 1465.9<br>1538.0<br>1610.0 | 2300  | 650.0<br>660.2<br>588.4 | 9.7          | 348<br>357<br>366           | 632.8          |
| DHB-DEA-DD 0010                                                                     | 1465.9<br>1537.9<br>1609.9 | 2300  | 524.2<br>527.3<br>496.7 | 9.2          | 345<br>347<br>356           | 516.1          |
| DHB-DEA-DD 0011                                                                     | 1465.8<br>1537.8<br>1609.8 | 2300  | 468.8<br>455.9<br>446.6 | 9.4          | 338<br>335<br>345           | 457.0          |
| DHB-DEA-DD 0012                                                                     | 1465.4<br>1537.4<br>1609.4 | 2300  | 587.6<br>605.5<br>559.7 | 9.5          | 345<br>350<br>355           | 584.3          |
| DHB-DEA-DD 0013                                                                     | 1466.2<br>1538.2<br>1610.2 | 2300  | 688.2<br>658.9<br>586.2 | 9.2          | 349<br>354<br>350           | 644.4          |



|                 |                            |      |                         |      |                   |       |
|-----------------|----------------------------|------|-------------------------|------|-------------------|-------|
| DHB-DEA-DD 0014 | 1465.8<br>1537.8<br>1609.8 | 2300 | 640.0<br>602.7<br>541.3 | 8.8  | 343<br>341<br>341 | 594.7 |
| DHB-DEA-DD 0015 | 1465.7<br>1537.7<br>1609.7 | 2300 | 579.8<br>551.6<br>549.0 | 7.6  | 352<br>336<br>330 | 560.1 |
| DHB-DEA-DD 0016 | 1465.9<br>1538.0<br>1610.0 | 2300 | 650.0<br>660.2<br>588.4 | 9.7  | 348<br>357<br>366 | 632.8 |
| DHB-DEA-DD 0017 | 1466.0<br>1538.0<br>1610.0 | 2300 | 697.5<br>673.0<br>605.7 | 8.3  | 351<br>358<br>361 | 658.7 |
| DHB-DEA-DD 0018 | 1466.1<br>1538.1<br>1610.1 | 2300 | 557.8<br>531.8<br>498.9 | 8.7  | 331<br>330<br>336 | 529.5 |
| DHB-DEA-DD 0019 | 1465.9<br>1537.9<br>1609.9 | 2300 | 751.4<br>725.4<br>671.8 | 8.0  | 347<br>356<br>363 | 716.1 |
| DHB-DEA-DD 0020 | 1466.4<br>1538.3<br>1610.4 | 2300 | 569.6<br>567.0<br>513.1 | 10.0 | 328<br>336<br>338 | 549.9 |
| DHB-DEA-DD 0021 | 1466.0<br>1538.0<br>1610.0 | 2300 | 584.7<br>624.5<br>588.5 | 8.7  | 336<br>344<br>348 | 599.1 |
| DHB-DEA-DD 0022 | 1466.2<br>1538.2<br>1610.2 | 2300 | 367.8<br>400.1<br>390.3 | 9.6  | 328<br>343<br>341 | 386.1 |
| DHB-DEA-DD 0023 | 1465.7<br>1537.8<br>1609.7 | 2300 | 488.4<br>515.8<br>496.6 | 7.4  | 338<br>344<br>348 | 500.1 |
| DHB-DEA-DD 0024 | 1466.0<br>1538.0<br>1609.9 | 2300 | 457.3<br>488.9<br>459.7 | 10.4 | 339<br>352<br>355 | 468.5 |
| DHB-DEA-DD 0025 | 1466.1<br>1538.2<br>1610.2 | 2300 | 497.6<br>510.7<br>505.2 | 9.7  | 341<br>350<br>360 | 504.5 |
| DHB-DEA-DD 0026 | 1466.2<br>1538.1<br>1610.2 | 2300 | 452.8<br>484.7<br>468.6 | 9.9  | 346<br>356<br>359 | 468.6 |
| DHB-DEA-DD 0027 | 1466.3<br>1538.3<br>1610.3 | 2300 | 369.1<br>393.5<br>378.4 | 9.7  | 330<br>338<br>338 | 380.2 |
| DHB-DEA-DD 0028 | 1466.0<br>1538.1<br>1610.0 | 2300 | 456.0<br>447.0<br>417.0 | 10.2 | 334<br>331<br>335 | 440.0 |

|                 |                            |      |                         |      |                   |       |
|-----------------|----------------------------|------|-------------------------|------|-------------------|-------|
| DHB-DEA-DD 0029 | 1465.9<br>1537.9<br>1610.0 | 2300 | 540.5<br>546.0<br>515.9 | 10.6 | 355<br>350<br>347 | 534.1 |
| DHB-DEA-DD 0030 | 1466.1<br>1538.0<br>1610.1 | 2300 | 460.3<br>455.5<br>476.4 | 8.6  | 338<br>323<br>345 | 464.1 |
| DHB-DEA-DD 0031 | 1466.2<br>1538.1<br>1610.2 | 2300 | 434.5<br>460.0<br>398.4 | 8.5  | 349<br>366<br>335 | 430.9 |
| DHB-DEA-DD 0032 | 1466.1<br>1538.1<br>1610.1 | 2300 | 380.1<br>399.4<br>350.5 | 7.5  | 311<br>332<br>309 | 376.7 |
| DHB-DEA-DD0033  | 1466.3<br>1538.3<br>1610.3 | 2300 | 437.8<br>429.8<br>447.1 | 8.7  | 346<br>345<br>366 | 438.2 |
| DHB-DEA-DD 0034 | 1466.4<br>1538.4<br>1610.5 | 2300 | 588.4<br>630.7<br>551.3 | 8.7  | 354<br>367<br>352 | 590.1 |
| DHB-DEA-DD 0035 | 1466.5<br>1538.5<br>1610.6 | 2300 | 513.1<br>513.9<br>485.0 | 9.6  | 347<br>357<br>364 | 504.0 |
| DHB-DEA-DD 0036 | 1466.1<br>1538.2<br>1610.2 | 2300 | 492.5<br>488.2<br>474.1 | 8.6  | 329<br>331<br>335 | 484.9 |
| DHB-DEA-DD 0037 | 1466.3<br>1538.3<br>1610.3 | 2300 | 420.0<br>431.9<br>415.0 | 7.6  | 333<br>337<br>339 | 422.3 |
| DHB-DEA-DD 0038 | 1466.2<br>1538.2<br>1610.3 | 2300 | 535.5<br>544.6<br>497.8 | 9.2  | 339<br>347<br>335 | 525.9 |
| DHB-DEA-DD 0039 | 1465.9<br>1537.9<br>1609.9 | 2300 | 434.7<br>464.7<br>436.5 | 7.8  | 324<br>327<br>322 | 445.2 |
| DHB-DEA-DD 0040 | 1466.4<br>1538.4<br>1610.4 | 2300 | 723.5<br>747.3<br>713.9 | 8.9  | 359<br>368<br>382 | 728.2 |
| DHB-DEA-DD 0041 | 1466.3<br>1538.3<br>1610.3 | 2300 | 653.3<br>667.7<br>651.2 | 8.7  | 351<br>356<br>369 | 657.4 |
| DHB-DEA-DD 0042 | 1466.2<br>1538.2<br>1610.3 | 2300 | 611.5<br>608.0<br>567.0 | 9.1  | 354<br>351<br>351 | 595.4 |
| DHB-DEA-DD 043  | 1466.4<br>1538.5<br>1610.5 | 2300 | 577.6<br>566.3<br>503.2 | 9.7  | 362<br>354<br>361 | 549.0 |

|                 |                            |      |                         |     |                   |       |
|-----------------|----------------------------|------|-------------------------|-----|-------------------|-------|
| DHB-DEA-DD 044  | 1466.2<br>1538.2<br>1610.2 | 2300 | 409.9<br>452.3<br>418.9 | 8.3 | 313<br>318<br>320 | 427.0 |
| DHB-DEA-DD 045  | 1466.4<br>1538.4<br>1610.4 | 2300 | 497.2<br>514.8<br>478.5 | 9.0 | 335<br>345<br>345 | 496.8 |
| DHB-DEA-DD 0046 | 1466.4<br>1538.4<br>1610.4 | 2300 | 564.0<br>563.4<br>531.2 | 8.8 | 343<br>339<br>347 | 552.8 |
| DHB-DEA-DD 0047 | 1466.1<br>1538.0<br>1610.0 | 2300 | 548.6<br>570.8<br>561.4 | 7.1 | 312<br>315<br>331 | 560.3 |
| DHB-DEA-DD 0048 | 1466.3<br>1538.3<br>1610.3 | 2300 | 603.2<br>615.0<br>578.5 | 7.7 | 347<br>355<br>364 | 598.9 |
| DHB-DEA-DD 0049 | 1466.4<br>1538.5<br>1610.5 | 2300 | 643.1<br>620.9<br>553.3 | 8.6 | 351<br>355<br>343 | 605.7 |
| DHB-DEA-DD 0050 | 1466.3<br>1538.2<br>1610.4 | 2300 | 732.6<br>745.9<br>700.9 | 7.8 | 333<br>336<br>340 | 726.4 |
| DHB-DEA-DD 0051 | 1466.5<br>1538.6<br>1610.6 | 2300 | 620.4<br>597.2<br>557.6 | 8.8 | 365<br>363<br>360 | 519.7 |
| DHB-DEA-DD 0052 | 1466.1<br>1538.1<br>1610.1 | 2300 | 680.3<br>669.4<br>630.8 | 7.2 | 290<br>299<br>305 | 669.1 |
| DHB-DEA-DD 0053 | 1466.5<br>1538.5<br>1610.6 | 2300 | 519.4<br>540.0<br>527.5 | 7.8 | 347<br>341<br>348 | 528.9 |
| DHB-DEA-DD 0054 | 1466.2<br>1538.2<br>1610.2 | 2300 | 647.1<br>623.7<br>583.9 | 9.0 | 351<br>350<br>358 | 618.2 |
| DHB-DEA-DD 0055 | 1466.2<br>1538.3<br>1610.3 | 2300 | 683.2<br>748.6<br>679.4 | 7.7 | 360<br>373<br>362 | 703.6 |
| DHB-DEA-DD 0056 | 1465.6<br>1537.5<br>1609.5 | 2300 | 648.2<br>652.3<br>637.7 | 6.9 | 352<br>333<br>353 | 646.1 |
| DHB-DEA-DD 0057 | 1465.8<br>1537.8<br>1609.8 | 2300 | 646.7<br>622.8<br>588.0 | 8.3 | 343<br>341<br>343 | 619.2 |
| DHB-DEA-DD 0058 | 1466.3<br>1538.3<br>1610.3 | 2300 | 562.2<br>576.7<br>531.4 | 8.7 | 334<br>336<br>341 | 556.7 |

|                 |                            |      |                         |     |                   |       |
|-----------------|----------------------------|------|-------------------------|-----|-------------------|-------|
| DHB-DEA-DD 0059 | 1466.7<br>1538.7<br>1610.8 | 2300 | 526.1<br>558.8<br>563.7 | 8.8 | 351<br>346<br>351 | 549.1 |
| DHB-DEA-DD 0060 | 1466.6<br>1538.6<br>1610.7 | 2300 | 629.4<br>650.2<br>595.5 | 7.9 | 353<br>363<br>370 | 625.0 |
| DHB-DEA-DD 0061 | 1465.9<br>1538.0<br>1609.9 | 2300 | 696.0<br>703.1<br>659.2 | 7.2 | 361<br>359<br>352 | 686.1 |
| DHB-DEA-DD 0062 | 1466.2<br>1538.1<br>1610.2 | 2300 | 712.3<br>791.6<br>722.6 | 8.1 | 353<br>361<br>350 | 742.2 |
| DHB-DEA-DD 0063 | 1466.4<br>1538.4<br>1610.4 | 2300 | 691.0<br>704.6<br>661.3 | 8.3 | 354<br>362<br>367 | 685.6 |
| DHB-DEA-DD-0064 | 1466.0153<br>8.1<br>1610.1 | 2300 | 772.1<br>756.8<br>703.1 | 8.8 | 351<br>353<br>353 | 744.0 |
| DHB-DEA-DD 0065 | 1465.9<br>1537.9<br>1609.8 | 2300 | 573.4<br>608.3<br>591.7 | 7.3 | 323<br>319<br>330 | 591.1 |
| DHB-DEA-DD 0066 | 1465.8<br>1537.8<br>1609.8 | 2300 | 716.3<br>764.3<br>726.3 | 8.0 | 340<br>349<br>353 | 735.5 |
| DHB-DEA-DD 0067 | 1466.3<br>1538.3<br>1610.4 | 2300 | 799.5<br>803.0<br>751.1 | 8.9 | 350<br>347<br>361 | 784.4 |
| DHB-DEA-DD 0068 | 1466.3<br>1538.3<br>1610.4 | 2300 | 715.1<br>747.4<br>695.0 | 8.9 | 339<br>338<br>351 | 719.2 |
| DHB-DEA-DD 0069 | 1466.1<br>1538.1<br>1610.2 | 2300 | 681.2<br>703.9<br>622.1 | 8.5 | 340<br>352<br>345 | 669.1 |
| DHB-DEA-DD 0070 | 1466.4<br>1538.4<br>1610.4 | 2300 | 707.6<br>720.5<br>659.5 | 8.9 | 346<br>360<br>361 | 695.8 |

**Table S-4. The data described of S/N of PLLA used DHB-DEA matrix by SF method.**

| Solvent Free<br>1mg polymer/<br>50 mg matrix<br>DHB-DEA-PLLA | Selected<br>peak                                               | Laser | S/N                                                | RMS<br>noise | Resolution<br>FW/HM,<br>50%            | Average<br>S/N |
|--------------------------------------------------------------|----------------------------------------------------------------|-------|----------------------------------------------------|--------------|----------------------------------------|----------------|
| DHB-DEA-<br>SF 0013                                          | 1467.39<br>1539.49<br>1611.48<br>1683.55<br>1755.82<br>1827.83 | 2300  | 108.1<br>131.5<br>139.2<br>148.6<br>155.3<br>151.4 | 11.8         | 211<br>229<br>230<br>237<br>253<br>262 | 139.0          |
| DHB-DEA-<br>SF 0014                                          | 1466.61<br>1538.73<br>1610.76<br>1683.07<br>1754.81<br>1826.85 | 2200  | 119.4<br>145.4<br>142.6<br>153.7<br>154.9<br>160.0 | 9.2          | 281<br>297<br>291<br>315<br>307<br>327 | 146            |
| DHB-DEA-<br>SF 0015                                          | 1466.80<br>1538.84<br>1610.74<br>1683.01<br>1754.99<br>1826.99 | 2300  | 124.9<br>142.2<br>158.7<br>154.8<br>174.9<br>165.6 | 9.9          | 256<br>255<br>263<br>263<br>281<br>298 | 153.5          |
| DHB-DEA-<br>SF 0016                                          | 1466.53<br>1538.45<br>1610.63<br>1682.65<br>1754.78<br>1826.65 | 2300  | 154.4<br>166.8<br>177.8<br>169.8<br>181.8<br>185.5 | 9.1          | 264<br>284<br>277<br>284<br>276<br>294 | 172.68         |
| DHB-DEA-<br>SF 017                                           | 1466.92<br>1538.78<br>1611.03<br>1683.06<br>1755.18<br>1827.18 | 2300  | 128.2<br>144.0<br>140.4<br>159.7<br>157.3<br>151.3 | 13.2         | 228<br>237<br>230<br>241<br>244<br>243 | 146.8          |
| DHB-DEA-<br>SF 0018                                          | 1466.41<br>1538.39<br>1610.51<br>1682.57<br>1754.53<br>1826.55 | 2300  | 123.0<br>132.2<br>143.3<br>156.9<br>158.9<br>157.9 | 12.9         | 305<br>307<br>301<br>326<br>330<br>337 | 145.4          |
| DHB-DEA-<br>SF 0019                                          | 1466.09<br>1538.10                                             | 2300  | 145.6<br>166.8                                     | 10.9         | 329<br>326                             | 173.6          |

|                      |                                                                |      |                                                    |      |                                        |       |
|----------------------|----------------------------------------------------------------|------|----------------------------------------------------|------|----------------------------------------|-------|
|                      | 1610.13<br>1682.26<br>1754.12<br>1826.23                       |      | 169.2<br>185.3<br>185.9<br>188.5                   |      | 331<br>345<br>352<br>350               |       |
| DHB-DEA –<br>SF 0020 | 1466.61<br>1538.57<br>1610.73<br>1682.71<br>1754.65<br>1826.74 | 2300 | 164.5<br>177.6<br>181.3<br>181.7<br>193.8<br>179.1 | 14.1 | 308<br>304<br>308<br>318<br>335<br>324 | 179.7 |
| DHB-DEA-<br>SF 0021  | 1466.45<br>1538.44<br>1610.62<br>1682.56<br>1754.67<br>1826.72 | 2300 | 132.6<br>155.1<br>164.6<br>167.5<br>168.1<br>174.0 | 12.3 | 314<br>330<br>324<br>327<br>317<br>337 | 160.3 |
| DHB-DEA-<br>SF 0022  | 1466.09<br>1538.20<br>1610.17<br>1682.32<br>1754.20<br>1826.28 | 2300 | 139.8<br>145.1<br>159.1<br>178.4<br>179.8<br>188.2 | 10.9 | 307<br>304<br>336<br>344<br>334<br>364 | 165.1 |
| DHB-DEA-<br>SF 0023  | 1466.21<br>1538.27<br>1610.20<br>1682.24<br>1754.26<br>1826.35 | 2300 | 122.2<br>144.8<br>160.4<br>177.3<br>171.3<br>180.1 | 10.8 | 303<br>300<br>320<br>320<br>339<br>340 | 159.4 |
| DHB-DEA-<br>SF 0024  | 1466.66<br>1538.69<br>1610.65<br>1682.69<br>1754.83<br>1826.82 | 2300 | 128.6<br>154.6<br>165.8<br>180.0<br>185.2<br>170.6 | 11.9 | 287<br>291<br>306<br>314<br>327<br>314 | 164.1 |
| DHB-DEA-<br>SF 0025  | 1466.94<br>1538.82<br>1610.90<br>1683.07<br>1755.19<br>1827.22 | 2300 | 137.5<br>152.6<br>156.4<br>160.9<br>169.6<br>165.7 | 10.5 | 268<br>281<br>289<br>289<br>299<br>300 | 157.1 |
| DHB-DEA-<br>SF 0026  | 1466.46<br>1538.43<br>1610.53<br>1682.54<br>1754.59<br>1826.63 | 2300 | 130.2<br>154.7<br>170.3<br>159.6<br>166.7<br>164.7 | 13.2 | 267<br>275<br>282<br>273<br>283<br>281 | 157.7 |

|                 |                                                                |      |                                                    |      |                                        |       |
|-----------------|----------------------------------------------------------------|------|----------------------------------------------------|------|----------------------------------------|-------|
| DHB-DEA-SF 0027 | 1466.62<br>1538.42<br>1610.62<br>1682.77<br>1754.67<br>1826.71 | 2300 | 132.9<br>142.9<br>149.4<br>155.5<br>161.3<br>153.9 | 13.1 | 264<br>272<br>273<br>277<br>290<br>283 | 149.3 |
| DHB-DEA-SF 0028 | 1466.45<br>1538.59<br>1610.59<br>1682.71<br>1754.66<br>1826.65 | 2300 | 157.3<br>162.1<br>194.0<br>193.4<br>184.6<br>200.3 | 13.8 | 318<br>302<br>336<br>338<br>327<br>352 | 181.9 |
| DHB-DEA-SF 0029 | 1466.63<br>1538.73<br>1610.62<br>1682.78<br>1754.72<br>1826.82 | 2300 | 138.3<br>148.9<br>163.7<br>174.3<br>178.5<br>177.0 | 11.7 | 292<br>298<br>322<br>320<br>334<br>330 | 163.5 |
| DHB-DEA-SF 0030 | 1466.44<br>1538.60<br>1610.69<br>1682.68<br>1754.75            | 2300 | 128.1<br>147.7<br>165.9<br>157.2<br>165.6          | 15.7 | 292<br>300<br>323<br>316<br>318        | 127.3 |
| DHB-DEA-SF 0031 | 1466.37<br>1538.34<br>1610.45<br>1682.53<br>1754.58<br>1826.66 | 2300 | 134.5<br>143.5<br>159.8<br>168.1<br>159.0<br>151.2 | 17.6 | 309<br>294<br>317<br>324<br>329<br>315 | 152.7 |
| DHB-DEA-SF 0032 | 1466.51<br>1538.59<br>1610.68<br>1682.76<br>1754.78<br>1826.83 | 2300 | 179.9<br>204.2<br>212.9<br>210.6<br>207.0<br>197.7 | 21.2 | 305<br>310<br>299<br>305<br>317<br>318 | 202.0 |
| DHB-DEA-SF 0033 | 1466.56<br>1538.67<br>1610.94<br>1683.33<br>1755.14<br>1827.17 | 2300 | 137.1<br>147.4<br>168.5<br>167.1<br>178.9<br>173.1 | 17.8 | 281<br>299<br>306<br>308<br>307<br>323 | 162.0 |
| DHB-DEA-SF 0034 | 1466.92<br>1539.01<br>1611.0<br>1683.11<br>1755.36             | 2300 | 134.1<br>150.6<br>156.8<br>158.6<br>153.2          | 17.8 | 274<br>274<br>297<br>295<br>276        | 153.2 |

|                 |                                                                |      |                                                    |      |                                        |       |
|-----------------|----------------------------------------------------------------|------|----------------------------------------------------|------|----------------------------------------|-------|
|                 | 1827.16                                                        |      | 165.8                                              |      | 302                                    |       |
| DHB-DEA-SF 0035 | 1466.52<br>1538.53<br>1610.65<br>1682.72<br>1754.76<br>1826.79 | 2300 | 131.3<br>135.5<br>154.4<br>151.5<br>139.2<br>148.7 | 17.5 | 288<br>305<br>326<br>321<br>316<br>321 | 143.4 |
| DHB-DEA-SF 0036 | 1466.47<br>1538.51<br>1610.62<br>1682.69<br>1754.58<br>1826.76 | 2300 | 140.4<br>163.9<br>163.4<br>174.4<br>180.6<br>174.8 | 15.9 | 296<br>305<br>305<br>312<br>325<br>327 | 166.3 |
| DHB-DEA-SF 0037 | 1466.62<br>1538.66<br>1610.77<br>1682.70<br>1754.88<br>1826.94 | 2300 | 137.0<br>153.9<br>158.6<br>158.2<br>163.4<br>168.4 | 19.8 | 283<br>283<br>300<br>292<br>297<br>313 | 156.6 |
| DHB-DEA-SF 0038 | 1466.42<br>1538.53<br>1610.57<br>1682.68<br>1754.76<br>1826.78 | 2300 | 149.6<br>168.2<br>178.6<br>184.8<br>181.6<br>177.1 | 18.1 | 299<br>301<br>324<br>329<br>319<br>328 | 173.3 |
| DHB-DEA-SF 0039 | 1466.55<br>1538.59<br>1610.60<br>1682.78<br>1754.71<br>1826.74 | 2300 | 133.5<br>153.0<br>160.7<br>161.6<br>158.4<br>164.4 | 15.7 | 278<br>288<br>293<br>293<br>303<br>317 | 155.3 |
| DHB-DEA-SF 0040 | 1466.78<br>1538.83<br>1610.96<br>1682.97<br>1755.16<br>1827.10 | 2300 | 154.1<br>160.0<br>165.2<br>174.2<br>175.9<br>174.1 | 17.1 | 240<br>243<br>242<br>264<br>254<br>259 | 167.3 |
| DHB-DEA-SF 0041 | 1466.09<br>1538.14<br>1610.20<br>1682.34<br>1754.28<br>1826.25 | 2300 | 138.9<br>158.2<br>167.2<br>170.1<br>173.2<br>179.9 | 18.5 | 295<br>312<br>296<br>298<br>305<br>322 | 164.6 |
| DHB-DEA-SF 0042 | 1466.53<br>1538.64                                             | 2300 | 125.9<br>148.3                                     | 19.9 | 278<br>284                             | 157.2 |



|                 |                                                                |      |                                                    |      |                                        |       |
|-----------------|----------------------------------------------------------------|------|----------------------------------------------------|------|----------------------------------------|-------|
|                 | 1610.62<br>1682.77<br>1754.70<br>1826.69                       |      | 157.4<br>170.2<br>175.2<br>166.3                   |      | 299<br>319<br>318<br>320               |       |
| DHB-DEA-SF 0043 | 1466.31<br>1538.29<br>1610.40<br>1682.49<br>1754.38<br>1826.52 | 2300 | 133.9<br>158.2<br>171.5<br>188.2<br>192.9<br>195.4 | 17.2 | 292<br>283<br>299<br>313<br>332<br>324 | 173.4 |
| DHB-DEA-SF 0044 | 1466.33<br>1538.48<br>1610.47<br>1682.48<br>1754.53<br>1826.63 | 2300 | 141.5<br>164.9<br>165.3<br>181.2<br>186.2<br>176.0 | 17.9 | 281<br>290<br>299<br>315<br>316<br>314 | 169.2 |
| DHB-DEA-SF 0045 | 1466.27<br>1538.37<br>1610.41<br>1682.43<br>1754.45<br>1826.50 | 2300 | 136.7<br>160.8<br>167.1<br>169.4<br>178.9<br>172.5 | 18.0 | 281<br>283<br>302<br>314<br>313<br>299 | 164.2 |
| DHB-DEA-SF 0046 | 1466.25<br>1538.25<br>1610.40<br>1682.43<br>1754.47<br>1826.47 | 2300 | 155.0<br>170.0<br>173.0<br>194.1<br>191.0<br>191.5 | 17.2 | 305<br>303<br>302<br>320<br>331<br>324 | 179.1 |
| DHB-DEA-SF 0047 | 1466.09<br>1538.18<br>1610.12<br>1682.17<br>1754.35<br>1826.23 | 2300 | 134.8<br>154.2<br>160.3<br>166.1<br>176.2<br>184.9 | 15.7 | 285<br>295<br>304<br>301<br>303<br>327 | 162.8 |
| DHB-DEA-SF 0048 | 1466.31<br>1538.42<br>1610.42<br>1682.48<br>1754.38<br>1826.48 | 2300 | 142.2<br>151.6<br>165.3<br>179.7<br>182.7<br>179.9 | 15.2 | 295<br>296<br>292<br>311<br>320<br>308 | 166.9 |
| DHB-DEA-SF 0049 | 1466.37<br>1538.38                                             | 2300 | 131.6<br>150.4                                     | 17.4 | 288<br>309                             | 157.2 |

|                 |                                                                           |      |                                                             |      |                                               |       |
|-----------------|---------------------------------------------------------------------------|------|-------------------------------------------------------------|------|-----------------------------------------------|-------|
|                 | 1610.50<br>1682.62<br>1754.52<br>1826.66                                  |      | 160.6<br>165.8<br>163.5<br>172.0                            |      | 301<br>304<br>314<br>312                      |       |
| DHB-DEA-SF 0050 | 1466.31<br>1538.41<br>1610.33<br>1682.47<br>1754.35<br>1826.56            | 2300 | 145.1<br>158.2<br>160.6<br>170.3<br>175.3<br>173.2          | 16.5 | 286<br>300<br>306<br>308<br>316<br>323        | 163.8 |
| DHB-DEA-SF 0051 | 1466.73<br>1538.85<br>1610.96<br>1682.96<br>1755.06<br>1827.13<br>1899.12 | 2300 | 137.8<br>159.1<br>162.9<br>162.8<br>175.9<br>169.0<br>174.5 | 16.9 | 269<br>285<br>295<br>288<br>304<br>306<br>309 | 190.2 |
| DHB-DEA-SF 0052 | 1466.82<br>1538.93<br>1610.92<br>1683.05<br>1755.11<br>1827.27<br>1899.19 | 2300 | 132.7<br>157.6<br>151.4<br>151.6<br>157.7<br>167.8<br>160.5 | 15.8 | 271<br>302<br>278<br>289<br>281<br>310<br>312 | 179.9 |
| DHB-DEA-SF 0053 | 1467.84<br>1539.88<br>1612.0<br>1683.92<br>1756.17<br>1828.29             | 2300 | 140.4<br>156.6<br>169.3<br>166.7<br>169.2<br>155.3          | 16.9 | 229<br>243<br>256<br>243<br>249<br>252        | 159.6 |
| DHB-DEA-SF 0054 | 1466.62<br>1538.61<br>1610.78<br>1682.89<br>1754.88<br>1826.91            | 2400 | 149.8<br>176.7<br>180.8<br>182.7<br>196.2<br>186.0          | 19.2 | 249<br>275<br>268<br>276<br>280<br>272        | 178.7 |
| DHB-DEA-SF 0055 | 1466.68<br>1538.68<br>1610.68<br>1682.76<br>1754.78<br>1826.79            | 2400 | 151.3<br>170.9<br>174.2<br>182.5<br>193.7<br>186.3          | 21.5 | 265<br>264<br>275<br>280<br>291<br>285        | 176.5 |

|                 |                                                                |      |                                                    |      |                                        |       |
|-----------------|----------------------------------------------------------------|------|----------------------------------------------------|------|----------------------------------------|-------|
| DHB-DEA-SF 0056 | 1466.66<br>1538.77<br>1610.71<br>1682.83<br>1754.84<br>1826.90 | 2400 | 135.6<br>145.3<br>165.3<br>173.9<br>165.1<br>164.2 | 20.1 | 287<br>281<br>295<br>296<br>296<br>305 | 158.2 |
| DHB-DEA-SF 0057 | 1466.73<br>1538.84<br>1610.90<br>1683.04<br>1755.05<br>1827.05 | 2400 | 140.3<br>154.7<br>165.7<br>172.9<br>180.2<br>170.4 | 21.7 | 277<br>281<br>288<br>282<br>296<br>299 | 164.0 |
| DHB-DEA-SF 0058 | 1466.62<br>1538.62<br>1610.67<br>1682.82<br>1754.66<br>1826.79 | 2400 | 141.7<br>164.1<br>162.2<br>160.2<br>160.6<br>180.5 | 22.1 | 267<br>293<br>281<br>288<br>304<br>309 | 161.6 |
| DHB-DEA-SF 0059 | 1466.31<br>1538.39<br>1610.42<br>1682.46<br>1754.62<br>1826.61 | 2400 | 145.4<br>156.0<br>172.1<br>168.6<br>173.1<br>166.8 | 22.2 | 284<br>277<br>297<br>304<br>296<br>314 | 163.7 |
| DHB-DEA-SF 0060 | 1466.76<br>1538.80<br>1610.91<br>1683.05<br>1755.09<br>1827.17 | 2400 | 153.5<br>159.6<br>170.3<br>174.6<br>179.9<br>171.8 | 20.8 | 279<br>275<br>289<br>287<br>304<br>291 | 168.3 |
| DHB-DEA-SF 0061 | 1466.31<br>1538.34<br>1610.38<br>1682.42<br>1754.52<br>1826.55 | 2400 | 151.1<br>166.9<br>172.0<br>186.2<br>187.9<br>171.7 | 18.4 | 283<br>292<br>303<br>320<br>317<br>314 | 172.6 |
| DHB-DEA-SF 0062 | 1466.63<br>1538.66<br>1610.73<br>1682.85<br>1754.83<br>1826.84 | 2400 | 142.0<br>159.3<br>173.3<br>175.7<br>177.2<br>183.3 | 21.8 | 267<br>278<br>295<br>286<br>301<br>298 | 168.5 |

**Table S-5. The data described of S/N of PLLA used IAA-DEA matrix by SF method.**

| Solvent free<br>C-1mg polymer<br>C-50 mg<br>matrix | Selected<br>peak                         | Laser       | S/N                              | RMS<br>noise | Resolution<br>FW/HM, 50% | Average<br>S/N |
|----------------------------------------------------|------------------------------------------|-------------|----------------------------------|--------------|--------------------------|----------------|
| IAA-DEA-SF-0047                                    | 1467.11<br>1539.32<br>1611.26<br>1827.60 | <b>1900</b> | 129.8<br>141.4<br>143.7<br>176.4 | 9.4          | 272<br>289<br>297<br>322 | 147.825        |
| IAA-DEA-SF-0048                                    | 1467.11<br>1539.32<br>1611.26<br>1827.60 | <b>1900</b> | 129.8<br>141.4<br>143.7<br>176.4 | 9.4          | 272<br>289<br>297<br>322 | 147.825        |
| IAA-DEA-SF-0049                                    | 1466.04<br>1537.98<br>1610.14<br>1826.32 | <b>1900</b> | 175.3<br>193.2<br>206.5<br>235.7 | 11.6         | 290<br>327<br>316<br>351 | 157.675        |
| IAA-DEA-SF-0050                                    | 1466.04<br>1537.98<br>1610.14<br>1826.32 | <b>1900</b> | 175.3<br>193.2<br>206.5<br>235.7 | 11.6         | 290<br>327<br>316<br>351 | 202.675        |
| IAA-DEA-SF-005                                     | 1466.33<br>1538.50<br>1610.49<br>1826.75 | <b>1900</b> | 160.4<br>172.7<br>193.9<br>216.0 | 12.4         | 309<br>329<br>326<br>342 | 185.75         |
| IAA-DEA-SF-0052                                    | 1466.29<br>1538.47<br>1610.54<br>1826.67 | <b>1900</b> | 142.3<br>169.6<br>177.4<br>197.9 | 9.2          | 267<br>311<br>303<br>334 | 171.8          |
| IAA-DEA-SF-0053w                                   | 1466.88<br>1539.14<br>1611.15<br>1827.67 | <b>1900</b> | 142.4<br>168.7<br>192.8<br>190.5 | 9.3          | 288<br>300<br>316<br>317 | 173.6          |
| IAA-DEA-SF0054                                     | 1467.2<br>1539.43<br>1611.59<br>1827.88  | <b>1900</b> | 162.0<br>168.6<br>192.7<br>204.4 | 9.6          | 297<br>322<br>320<br>332 | 136.925        |
| IAA-DEA-SF0055                                     | 1466.32<br>1538.22<br>1610.31<br>1826.56 | <b>1800</b> | 129.2<br>150.0<br>172.0<br>192.6 | 6.8          | 272<br>293<br>330<br>339 | 160.95         |
| IAA-DEA-SF-0056                                    | 1465.05<br>1536.93<br>1609.13<br>1825.24 | <b>1800</b> | 98.8<br>112.3<br>133.9<br>144.3  | 7.0          | 260<br>297<br>315<br>325 | 122.325        |

|                      |                                          |             |                                  |      |                          |         |
|----------------------|------------------------------------------|-------------|----------------------------------|------|--------------------------|---------|
| IAA –DEA-SF<br>0057  | 1465.48<br>1537.37<br>1609.50<br>1825.67 | <b>1800</b> | 141.5<br>172.8<br>174.2<br>197.1 | 8.0  | 293<br>324<br>330<br>356 | 168.9   |
| IAA-DEA-SF<br>0058   | 1465.68<br>1537.67<br>1609.71<br>1825.87 | <b>1900</b> | 157.4<br>175.5<br>194.6<br>190.6 | 8.8  | 291<br>319<br>310<br>326 | 179.525 |
| IAA-DEA-SF<br>0059   | 1467.05<br>1539.10<br>1611.19<br>1827.65 | <b>1900</b> | 168.4<br>185.2<br>191.8<br>209.9 | 8.8  | 293<br>314<br>321<br>322 | 143.825 |
| IAA-DEA-SF<br>0060   | 1466.51<br>1538.55<br>1610.68<br>1826.89 | <b>1900</b> | 136.0<br>150.8<br>161.5<br>185.5 | 7.5  | 291<br>313<br>327<br>335 | 158.45  |
| IAA-DEA-SF-<br>0061  | 1466.01<br>1538.09<br>1610.16<br>1826.38 | <b>1900</b> | 161.6<br>168.0<br>189.4<br>182.1 | 9.5  | 307<br>319<br>329<br>340 | 175.275 |
| IAA-DEA-SF<br>0062   | 1468.75<br>1540.97<br>1613.27<br>1829.77 | <b>1900</b> | 128.3<br>138.2<br>154.3<br>172.6 | 7.6  | 298<br>285<br>299<br>299 | 148.35  |
| IAA –DEA-Sf<br>0063  | 1466.28<br>1538.43<br>1610.60<br>1826.71 | <b>1900</b> | 160.1<br>156.6<br>176.9<br>220.9 | 9.6  | 317<br>313<br>307<br>372 | 178.625 |
| IAA –DEA-SF<br>0064I | 1467.12<br>1539.26<br>1611.46<br>1827.67 | <b>1900</b> | 179.1<br>200.2<br>226.4<br>242   | 6.2  | 288<br>312<br>330<br>337 | 211.925 |
| IAA-DEA-SF<br>0065   | 1467.12<br>1539.07<br>1611.17<br>1827.48 | <b>1900</b> | 130.1<br>150.5<br>154.6<br>178.2 | 10.3 | 284<br>312<br>328<br>333 | 153.35  |
| IAA-DEA-SF-<br>0066  | 1467.08<br>1539.24<br>1611.31<br>1827.60 | <b>1900</b> | 137.3<br>158.2<br>160.2<br>190.2 | 11.0 | 303<br>324<br>320<br>363 | 161.475 |
| IAA-DEA-SF-<br>0067  | 1467.46<br>1539.56<br>1611.68<br>1828.12 | <b>1900</b> | 136.0<br>152.1<br>161.8<br>171.6 | 33.6 | 310<br>317<br>349<br>348 | 155.375 |
| IAA-DEA-SF<br>0068   | 1467.82<br>1540.03<br>1612.20<br>1828.58 | <b>1900</b> | 143.0<br>155.4<br>177.1<br>187.9 | 10.6 | 324<br>330<br>342<br>346 | 165.85  |
| IAA-DEA-SF -         | 1466.59                                  | <b>1900</b> | 123.7                            | 10.0 | 274                      |         |

|                  |                                          |             |                                  |      |                          |         |
|------------------|------------------------------------------|-------------|----------------------------------|------|--------------------------|---------|
| 0069             | 1538.82<br>1610.66<br>1827.09            |             | 142.8<br>149.0<br>159.4          |      | 309<br>320<br>313        | 143.725 |
| IAA-DEA-SF-0070  | 1467.15<br>1539.32<br>1611.34<br>1827.72 | <b>1900</b> | 131.2<br>146.2<br>157.7<br>168.5 | 11.8 | 297<br>317<br>340<br>339 | 115.4   |
| IAA-DEA-SF-0071  | 1467.97<br>1539.99<br>1612.26<br>1828.59 | <b>1900</b> | 120.8<br>112.7<br>141.5<br>145.1 | 8.2  | 243<br>249<br>280<br>285 | 130.075 |
| IAA-DEA-SF-0072  | 1468.61<br>1540.93<br>1612.71<br>1829.45 | <b>1900</b> | 101.6<br>105.1<br>109.0<br>116.1 | 8.2  | 210<br>240<br>239<br>226 | 107.95  |
| IAA-DEA-SF-0073  | 1467.04<br>1539.19<br>1611.36<br>1827.60 | <b>1900</b> | 138.2<br>151.8<br>155.7<br>175.7 | 11.5 | 277<br>295<br>288<br>306 | 155.35  |
| IAA-DEA-SF-0074  | 1467.34<br>1539.64<br>1611.65<br>1828.07 | <b>1900</b> | 152.8<br>158.2<br>167.5<br>181.4 | 9.2  | 265<br>283<br>292<br>291 | 164.975 |
| IAA-DEA-SF-0075  | 1467.77<br>1539.80<br>1611.96<br>1828.39 | <b>1900</b> | 149.0<br>163.7<br>179.4<br>192.1 | 10.5 | 178<br>295<br>283<br>310 | 171.05  |
| IAA-DEA-SF-0076  | 1468.47<br>1540.80<br>1612.87<br>1829.52 | <b>1900</b> | 141.4<br>141.5<br>149.7<br>177.9 | 9.0  | 250<br>275<br>266<br>285 | 152.625 |
| IAA-DEA-SF-00771 | 1468.84<br>1540.98<br>1613.16<br>1829.88 | <b>1900</b> | 120.0<br>130.1<br>145.5<br>177.3 | 9.5  | 284<br>296<br>313<br>334 | 143.225 |
| IAA-DEA-SF-0078  | 1466.99<br>1539.06<br>1611.12<br>1827.37 | <b>2000</b> | 139.2<br>149.5<br>162.5<br>168.5 | 11.9 | 256<br>263<br>286<br>298 | 154.925 |
| IAA-DEA-SF-0079  | 1465.73<br>1537.91<br>1610.00<br>1826.0  | <b>1900</b> | 151.0<br>159.2<br>175.3<br>190.8 | 9.3  | 308<br>310<br>323<br>340 | 169.075 |
| IAA-DEA-SF-0080  | 1466.02<br>1538.10<br>1610.31<br>1826.53 | <b>1900</b> | 177.2<br>175.1<br>193.2<br>220.2 | 9.9  | 310<br>309<br>331<br>345 | 191.425 |
| IAA-DEA-SF -     | 1467.57                                  | <b>1900</b> | 163.1                            | 9.8  | 323                      |         |

|                  |                                          |             |                                  |      |                          |         |
|------------------|------------------------------------------|-------------|----------------------------------|------|--------------------------|---------|
| 0081             | 1539.74<br>1611.78<br>1828.19            |             | 176.2<br>192.8<br>211.9          |      | 317<br>340<br>350        | 186     |
| IAA-DEA-SF-0082  | 1469.18<br>1541.35<br>1613.65<br>1830.25 | <b>1900</b> | 168.3<br>179.7<br>178.4<br>191.1 | 7.6  | 291<br>287<br>282<br>275 | 179.375 |
| IAA-DEA-SF-0083  | 1466.52<br>1538.62<br>1610.46<br>1826.88 | <b>1900</b> | 150.9<br>157.8<br>173.5<br>201.5 | 8.1  | 304<br>308<br>332<br>349 | 125.925 |
| IAA-DEA-SF-0084  | 1467.47<br>1539.65<br>1611.68<br>1828.17 | <b>1900</b> | 152.0<br>168.7<br>171.8<br>188.5 | 10.3 | 283<br>307<br>304<br>321 | 170.25  |
| IAA-DEA-SF-0085  | 1467.91<br>1540.20<br>1612.29<br>1828.99 | <b>1900</b> | 116.5<br>139.8<br>144.8<br>165.5 | 7.5  | 252<br>264<br>260<br>277 | 141.65  |
| IAA-DEA-SF-0086  | 1468.50<br>1540.70<br>1612.94<br>1829.74 | <b>1900</b> | 105.8<br>103.8<br>115.2<br>130.7 | 8.6  | 191<br>207<br>202<br>207 | 113.875 |
| IAA-DEA-SF-00871 | 1467.36<br>1539.54<br>1611.61<br>1827.98 | <b>2000</b> | 160.7<br>161.6<br>188.7<br>199.9 | 14.6 | 294<br>303<br>311<br>324 | 177.725 |
| IAA-DEA-SF-0088  | 1466.64<br>1538.83<br>1610.84<br>1827.17 | <b>2000</b> | 138.8<br>163.1<br>166.2<br>176.9 | 13.3 | 250<br>300<br>302<br>308 | 161.25  |
| IAA-DEA-SF-0089  | 1467.72<br>1539.90<br>1612.0<br>1828.44  | <b>2000</b> | 147.8<br>166.6<br>185.5<br>197.5 | 13.3 | 302<br>321<br>338<br>345 | 174.35  |
| IAA-DEA-SF-0090  | 1467.68<br>1539.78<br>1612.05<br>1828.40 | <b>2000</b> | 132.2<br>145.8<br>149.9<br>171.5 | 14.4 | 259<br>300<br>287<br>307 | 149.85  |
| IAA-DEA-SF-0091  | 1467.86<br>1540.0<br>1612.09<br>1828.56  | <b>2000</b> | 129.4<br>148.6<br>150.6<br>174.3 | 16.0 | 268<br>298<br>286<br>314 | 150.725 |
| IAA-DEA-SF-0092  | 1468.80<br>1541.06<br>1613.13<br>1829.71 | <b>2000</b> | 147.1<br>147.2<br>170.2<br>184.4 | 14.1 | 290<br>304<br>319<br>321 | 162.225 |
| IAA-DEA-SF-      | 1467.16                                  | <b>2000</b> | 128.1                            | 12.2 | 263                      |         |

|                  |                                          |             |                                  |      |                          |         |
|------------------|------------------------------------------|-------------|----------------------------------|------|--------------------------|---------|
| 0093             | 1539.37<br>1611.47<br>1827.88            |             | 148.6<br>153.0<br>156.6          |      | 297<br>305<br>294        | 146.575 |
| IAA-DEA-SF-0094  | 1468.16<br>1540.49<br>1612.69<br>1829.19 | <b>2000</b> | 133.0<br>138.1<br>153.6<br>163.9 | 11.5 | 245<br>246<br>265<br>269 | 147.15  |
| IAA-DEA-SF-0095  | 1467.75<br>1539.99<br>1611.95<br>1828.25 | <b>2000</b> | 122.8<br>138.5<br>145.7<br>152.9 | 12.4 | 212<br>231<br>235<br>237 | 139.975 |
| IAA-DEA-SF-0096  | 1466.98<br>1539.11<br>1611.26<br>1827.55 | <b>2000</b> | 131.4<br>149.8<br>172.0<br>187.6 | 12.6 | 281<br>304<br>337<br>334 | 160.2   |
| IAA-DEA-SF-0097  | 1468.21<br>1540.45<br>1612.54<br>1829.16 | <b>2000</b> | 155.7<br>163.7<br>183.4<br>184.8 | 13.9 | 275<br>291<br>311<br>290 | 171.9   |
| IAA-DEA-SF-0098  | 1468.98<br>1541.29<br>1613.40<br>1830.10 | <b>2000</b> | 153.2<br>160.2<br>173.5<br>187.4 | 13.0 | 263<br>289<br>293<br>312 | 168.575 |
| IAA-DEA-SF-0099  | 1469.88<br>1542.31<br>1614.55<br>1831.12 | <b>2000</b> | 120.3<br>138.3<br>152.3<br>167.7 | 11.0 | 214<br>246<br>251<br>259 | 144.65  |
| IAA-DEA-SF-0100  | 1468.58<br>1541.0<br>1613.07<br>1829.59  | <b>2000</b> | 129.1<br>133.4<br>133.8<br>167.7 | 12.4 | 252<br>242<br>259<br>274 | 141     |
| IAA-DEA-SF--0101 | 1466.70<br>1538.86<br>1611.04<br>1827.20 | <b>2000</b> | 137.7<br>147.2<br>154.2<br>161.1 | 14.7 | 247<br>275<br>268<br>272 | 150.05  |
| IAA-DEA-SF-0102  | 1466.50<br>1538.70<br>1610.75<br>1826.96 | <b>2000</b> | 134.0<br>145.6<br>155.2<br>172.8 | 14.6 | 247<br>260<br>277<br>289 | 151.9   |
| IAA-DEA-SF-0103  | 1466.95<br>1539.19<br>1611.32<br>1827.59 | <b>2000</b> | 144.9<br>152.6<br>153.1<br>174.7 | 15.5 | 265<br>293<br>281<br>295 | 156.325 |
| IAA -DEA-SF-0104 | 1467.32<br>1539.64<br>1611.78<br>1828.13 | <b>2000</b> | 141.9<br>150.2<br>149.1<br>183.5 | 16.1 | 262<br>293<br>275<br>322 | 156.175 |
| IAA-DEA-SF-      | 1467.54                                  | <b>2000</b> | 151.7                            | 13.8 | 253                      | 154.5   |



|                    |                                          |             |                                  |      |                          |         |
|--------------------|------------------------------------------|-------------|----------------------------------|------|--------------------------|---------|
| 01051              | 1539.77<br>1611.91<br>1828.24            |             | 135.6<br>160.9<br>169.8          |      | 251<br>256<br>282        |         |
| IAA-DEA-SF-0106    | 1467.88<br>1540.10<br>1612.35<br>1828.93 | <b>2000</b> | 138.3<br>153.5<br>164.0<br>172.3 | 15.1 | 235<br>253<br>271<br>267 | 157.025 |
| IAA-DEA-SF-0107    | 1468.68<br>1540.95<br>1613.17<br>1829.72 | <b>2000</b> | 148.6<br>153.8<br>167.1<br>177.9 | 14.7 | 275<br>294<br>300<br>317 | 161,85  |
| IAA-DEA-SF-0108    | 1467.09<br>1539.13<br>1611.39<br>1827.62 | <b>2000</b> | 153.1<br>156.4<br>174.5<br>184.0 | 15.3 | 265<br>285<br>291<br>302 | 167.0   |
| IAA-DEA-SF-01091   | 1467.52<br>1539.67<br>1611.88<br>1828.27 | <b>2000</b> | 150.4<br>159.2<br>177.9<br>180.3 | 14.5 | 281<br>283<br>294<br>298 | 166.95  |
| IAA-DEA-SF-0110lin | 1467.25<br>1539.40<br>1611.48<br>1827.91 | <b>2000</b> | 145.5<br>143.5<br>158.5<br>168.0 | 15.3 | 255<br>271<br>291<br>299 | 153.875 |
| IAA-DEA-SF-0111    | 1467.10<br>1539.36<br>1611.50<br>1827.86 | <b>2000</b> | 149.9<br>161.2<br>171.3<br>183.7 | 14.7 | 255<br>276<br>298<br>297 | 166.525 |
| IAA-DEA-SF-0112    | 1467.26<br>1539.48<br>1611.69<br>1828.03 | <b>2000</b> | 152.0<br>170.7<br>168.1<br>187.0 | 14.9 | 238<br>294<br>270<br>296 | 169.45  |
| IAA-DEA-SF-0113    | 1468.61<br>1540.82<br>1612.88<br>1829.43 | <b>2000</b> | 141.2<br>160.3<br>169.0<br>180.5 | 14.8 | 271<br>286<br>302<br>303 | 162.75  |
| IAA-DEA-SF-0114    | 1468.59<br>1540.80<br>1613.02<br>1829.79 | <b>2000</b> | 131.3<br>151.2<br>146.8<br>165.7 | 16.8 | 250<br>274<br>281<br>280 | 148.75  |
| IAA-DEA-SF-0115    | 1468.50<br>1540.61<br>1612.94<br>1829.39 | <b>2000</b> | 116.5<br>131.4<br>136.9<br>154.4 | 15.4 | 199<br>229<br>229<br>230 | 134.8   |
| IAA-DEA-SF-0116    | 1469.15<br>1541.49<br>1613.70<br>1830.30 | <b>2000</b> | 149.7<br>148.9<br>162.0<br>168.6 | 16.3 | 258<br>277<br>277<br>295 | 157.3   |
| IAA-DEA-SF-        | 1468.62                                  | <b>2000</b> | 119.3                            | 13.1 | 219                      | 134.2   |

|                  |                                          |             |                                  |      |                          |         |
|------------------|------------------------------------------|-------------|----------------------------------|------|--------------------------|---------|
| 0117             | 1540.83<br>1613.02<br>1829.54            |             | 127.5<br>142.4<br>147.6          |      | 237<br>244<br>247        |         |
| IAA-DEA-SF-0118  | 1468.96<br>1541.22<br>1613.30<br>1829.99 | <b>2000</b> | 120.3<br>127.8<br>144.9<br>150.8 | 12.7 | 209<br>217<br>234<br>236 | 135.9   |
| IAA-DEA-SF 0119  | 1467.24<br>1539.58<br>1611.60<br>1828.10 | <b>2000</b> | 129.7<br>147.7<br>154.4<br>150.0 | 14.0 | 225<br>260<br>267<br>255 | 145.45  |
| IAA –DEA-SF 0120 | 1467.91<br>1540.32<br>1612.48<br>1829.01 | <b>2000</b> | 133.2<br>147.4<br>153.2<br>175.2 | 13.7 | 259<br>261<br>260<br>289 | 152.25  |
| IAA –DEA-SF 0121 | 1468.90<br>1541.24<br>1613.38<br>1830.03 | <b>2000</b> | 136.1<br>139.2<br>153.2<br>166.6 | 15.2 | 231<br>254<br>258<br>269 | 148.78  |
| IAA-DEA-SF 0122  | 1470.18<br>1542.55<br>1614.91<br>1831.69 | <b>2000</b> | 137.0<br>136.2<br>153.4<br>159.7 | 14.7 | 250<br>258<br>259<br>267 | 146.575 |

**Table S-6. The data described of S/N of PLLA used IAA-DEA matrix by DD method.**

| <b>Dried Droplet<br/>IAA-DEA-PLLA<br/>C-polymer(0.1g/ml)<br/>C-matrix(0.25g/ml)</b> | Selected peak              | Laser | S/N                      | RMS noise | Resolution FW/HM, 50% | Average S/N |
|-------------------------------------------------------------------------------------|----------------------------|-------|--------------------------|-----------|-----------------------|-------------|
| IAA-DEA-DD 0001                                                                     | 1394.4<br>1466.4<br>1538.5 | 1900  | 457.4<br>506.3;<br>476.3 | 12.0      | 321<br>315<br>309     | 480;        |
| IAA-DEA-DD 0002                                                                     | 1393.7<br>1465.7<br>1537.8 | 1900  | 634.6<br>715.0;<br>699.1 | 12.1      | 339<br>339<br>341     | 682.9;      |
| IAA-DEA-DD 0003                                                                     | 1393.6<br>1465.6<br>1537.6 | 1900  | 590.3<br>679.5;<br>643.8 | 11.4      | 309<br>310<br>311     | 637.8;      |
| IAA-DEA-DD 0004                                                                     | 1393.7<br>1465.7<br>1537.8 | 1900  | 572.4<br>619.3;<br>578.3 | 13.6      | 321<br>316<br>317     | 590;        |
| IAA-DEA-DD                                                                          | 1393.4                     | 1900  | 612.0                    | 12.3      | 308                   | 655.7;      |

|                     |                            |      |                          |      |                   |        |
|---------------------|----------------------------|------|--------------------------|------|-------------------|--------|
| 0005                | 1465.4<br>1537.4           |      | 698.6;<br>656.4          |      | 318<br>314        |        |
| IAA-DEA-DD<br>0006  | 1394.1<br>1466.1<br>1538.1 | 1900 | 430.2<br>502.0;<br>466.9 | 8.7  | 320<br>335<br>335 | 466.4; |
| IAA-DEA-DD<br>0007  | 1393.7<br>1465.8<br>1537.8 | 1900 | 553.4<br>612.4;<br>556.7 | 11.1 | 336<br>340<br>343 | 574.2, |
| IAA-DEA-DD<br>0008  | 1393.5<br>1465.5<br>1537.5 | 1800 | 703.7<br>750.7;<br>700.2 | 11.7 | 341<br>344<br>352 | 718.1; |
| IAA-DEA-DD<br>0009  | 1394.2<br>1466.2<br>1538.2 | 1900 | 453.2<br>507.1;<br>452.5 | 10.4 | 341<br>354<br>344 | 470.9; |
| IAA-DEA-DD<br>0010  | 1393.2<br>1465.1<br>1537.1 | 1900 | 532.2<br>659.2;<br>660.2 | 8.2  | 339<br>343<br>357 | 617.1; |
| IAA-DDEA-DD<br>0011 | 1392.9<br>1464.8<br>1536.8 | 1900 | 385.4<br>531.5;<br>548.5 | 8.0  | 316<br>327<br>331 | 488.5; |
| IAA-DEA-DD<br>0012  | 1393.1<br>1465.1<br>1537.1 | 1900 | 616.6<br>712.6;<br>685.3 | 9.8  | 335<br>340<br>345 | 671.5; |
| IAA-DEA-DD<br>0013  | 1393.3<br>1465.3<br>1537.3 | 1900 | 528.2<br>613.5;<br>593.0 | 9.7  | 306<br>308<br>312 | 578.1; |
| IAA-DEA-DD<br>0014  | 1394.2<br>1466.2<br>1538.3 | 1900 | 360.1<br>406.2;<br>368.9 | 8.8  | 272<br>280<br>291 | 378.4; |
| IAA-DEA-<br>DD0015  | 1394.1<br>1466.1<br>1538.1 | 1900 | 530.0<br>564.5;<br>518.1 | 10.4 | 338<br>350<br>350 | 537.5; |
| IAA-DEA-DD<br>0016  | 1394.0<br>1466.0<br>1537.9 | 1900 | 464.7<br>492.8;<br>460.6 | 8.7  | 313<br>327<br>322 | 472.6; |
| IAA-DEA DD<br>0017  | 1394.5<br>1466.6<br>1538.7 | 1900 | 468.9<br>485.7;<br>438.9 | 9.5  | 344<br>336<br>331 | 464.5; |
| IAA-DEA-DD<br>0018  | 1394.0<br>1466.0<br>1538.1 | 1900 | 564.3<br>570.3;<br>527.6 | 10.7 | 340<br>332<br>342 | 554.1; |
| IAA-DEA-DD<br>0019  | 1393.6<br>1465.6<br>1537.6 | 1900 | 479.3<br>538.3;<br>534.9 | 9.5  | 338<br>338<br>355 | 517.5; |
| IAA-DEA-DD          | 1394.2                     | 1900 | 325.4                    | 10.2 | 266               | 346.4; |

|                    |                            |      |                          |      |                   |        |
|--------------------|----------------------------|------|--------------------------|------|-------------------|--------|
| 0020               | 1466.2<br>1538.2           |      | 365.3;<br>348.4          |      | 282<br>277        |        |
| IAA-DEA-DD<br>0021 | 1393.4<br>1465.4<br>1537.4 | 1900 | 641.2<br>709.0;<br>699.4 | 9.0  | 331<br>338<br>347 | 683.2; |
| IAA-DEA-DD<br>0022 | 1393.6<br>1465.6<br>1537.6 | 1900 | 520.6<br>633.6;<br>624.2 | 7.6  | 320<br>332<br>347 | 592.8; |
| IAA-DEA-DD<br>0023 | 1394.5<br>1466.5<br>1538.6 | 1900 | 408.1<br>444.7;<br>407.9 | 9.3  | 343<br>342<br>347 | 420.1; |
| IAA-DEA-DD<br>0024 | 1394.3<br>1466.3<br>1538.4 | 1900 | 539.7<br>592.6;<br>536.7 | 9.6  | 337<br>343<br>341 | 556.2; |
| IAA-DEA-DD<br>0025 | 1394.1<br>1466.1<br>1538.2 | 1900 | 561.6<br>588.9;<br>537.2 | 9.5  | 339<br>345<br>344 | 562.6; |
| IAA-DEA-DD<br>0026 | 1393.7<br>1465.7<br>1537.8 | 1900 | 489.1<br>565.7;<br>506.1 | 8.3  | 308<br>324<br>327 | 520.3; |
| IAA-DEA-DD<br>0027 | 1393.9<br>1466.0<br>1537.9 | 1900 | 543.5<br>583.4;<br>584.5 | 9.0  | 328<br>331<br>345 | 570.5; |
| IAA-DED-DD<br>0028 | 1394.2<br>1466.2<br>1538.3 | 1900 | 563.6<br>584.1;<br>523.0 | 10.2 | 334<br>328<br>342 | 556.9; |
| IAA-DEA-DD<br>0029 | 1394.2<br>1466.2<br>1538.3 | 1900 | 526.0<br>569.0;<br>505.9 | 9.9  | 345<br>346<br>338 | 533.5; |
| IAA-DEA-DD<br>0030 | 1394.2<br>1466.2<br>1538.2 | 1900 | 417.2<br>444.5;<br>427.6 | 9.1  | 297<br>293<br>295 | 429.8; |
| IAA-DEA-DD<br>0031 | 1394.3<br>1466.3<br>1538.4 | 1900 | 560.1<br>586.7;<br>538.1 | 9.8  | 342<br>345<br>343 | 561.5; |
| IAA-DEA-DD<br>0032 | 1394.0<br>1466.0<br>1538.0 | 1900 | 441.0<br>510.2;<br>483.0 | 8.3  | 340<br>346<br>332 | 478.1; |
| IAA-DEA-DD<br>0033 | 1394.0<br>1466.0<br>1538.0 | 1900 | 441.0<br>510.2-<br>483.0 | 8.3  | 340<br>346<br>332 | 478.1  |

|                    |                            |      |                          |      |                   |        |
|--------------------|----------------------------|------|--------------------------|------|-------------------|--------|
| IAA-DEA-DD<br>0034 | 1394.3<br>1466.3<br>1538.4 | 1900 | 585.7<br>660.9;<br>619.8 | 10.0 | 347<br>356<br>366 | 622.1; |
| IAA-DEA-DD<br>0035 | 1393.7<br>1465.7<br>1537.7 | 1900 | 548.5<br>629.5;<br>599.8 | 9.2  | 331<br>339<br>327 | 592.5; |
| IAA-DEA-DD<br>0036 | 1393.5<br>1465.5<br>1537.5 | 1900 | 541.0<br>609.6;<br>597.2 | 9.9  | 327<br>330<br>338 | 582.5; |
| IAA-DEA-DD<br>0037 | 1393.8<br>1465.8<br>1537.8 | 1900 | 644.4<br>720.1;<br>645.0 | 10.1 | 354<br>355<br>347 | 669.7; |
| IAA-DEA-DD<br>0038 | 1394.8<br>1466.9<br>1538.9 | 1900 | 466.0<br>487.0;<br>433.4 | 10.2 | 336<br>353<br>345 | 462.1; |
| IAA-DEA-DD<br>0039 | 1394.2<br>1466.2<br>1538.2 | 1900 | 574.2<br>619.7;<br>582.6 | 8.9  | 340<br>344<br>348 | 592.2; |
| IAA-DEA-DD<br>0040 | 1393.1<br>1465.7<br>1537.7 | 1900 | 556.2<br>606.7;<br>606.5 | 9.0  | 339<br>336<br>343 | 589.7; |
| IAA-DEA-DD<br>0041 | 1394.8<br>1466.9<br>1539.0 | 1900 | 465.2<br>488.5;<br>432.2 | 10.0 | 341<br>343<br>343 | 461.9; |
| IAA-DEA-DD<br>0042 | 1393.9<br>1465.9<br>1537.9 | 1900 | 643.9<br>683.5;<br>627.4 | 10.3 | 336<br>339<br>352 | 651.5; |
| IAA-DEA-DD<br>0043 | 1394.0<br>1466.0<br>1538.1 | 1900 | 507.9<br>550.0;<br>535.9 | 9.6  | 325<br>315<br>323 | 531.3; |
| IAA-DEA-DD<br>0044 | 1394.1<br>1466.1<br>1538.1 | 1900 | 610.6<br>657.6;<br>616.2 | 8.6  | 336<br>344<br>343 | 628.1; |
| IAA-DEA-DD<br>0045 | 1394.8<br>1466.9<br>1538.9 | 1900 | 466.0<br>487.0;<br>433.4 | 10.2 | 336<br>353<br>345 | 462.1; |
| IAA-DEA-DD<br>0046 | 1394.1<br>1466.1<br>1538.1 | 1900 | 492.6<br>514.9;<br>512.1 | 9.7  | 329<br>333<br>338 | 506.4; |
| IAA-DEA-DD<br>0047 | 1394.2<br>1466.1<br>1538.2 | 1900 | 504.8<br>563.3;<br>527.3 | 6.9  | 322<br>335<br>330 | 531.7; |
| IAA-DEA-DD<br>0048 | 1394.3<br>1466.4           | 1900 | 536.9<br>562.5;          | 10.8 | 345<br>342        | 539.2; |

|                    |                            |      |                          |      |                   |        |
|--------------------|----------------------------|------|--------------------------|------|-------------------|--------|
|                    | 1538.4                     |      | 518.1                    |      | 353               |        |
| IAA-DEA-DD<br>0049 | 1394.5<br>1466.5<br>1538.6 | 1900 | 529.7<br>527.1;<br>479.3 | 10.5 | 335<br>334<br>341 | 512.0; |
| IAA-DEA-DD<br>0050 | 1394.8<br>1466.8<br>1538.9 | 1900 | 471.5<br>476.9;<br>432.8 | 9.4  | 335<br>340<br>343 | 460.3; |
| IAA-DEA-DD<br>0051 | 1394.2<br>1466.2<br>1538.2 | 1900 | 564.5<br>618.4;<br>547.8 | 8.1  | 343<br>358<br>355 | 576.9  |
| IAA-DEA-DD<br>0052 | 1394.4<br>1466.4<br>1538.4 | 1900 | 572.0<br>631.6;<br>551.8 | 9.3  | 337<br>352<br>347 | 585.1; |
| IAA-DEA-DD<br>0053 | 1394.7<br>1466.8<br>1538.9 | 1900 | 488.5<br>487.9;<br>423.6 | 10.2 | 344<br>337<br>347 | 466.7; |
| IAA-DEA-DD<br>0054 | 1394.4<br>1466.5<br>1538.5 | 1900 | 549.9<br>581.1;<br>517.5 | 9.5  | 339<br>345<br>335 | 549.5; |
| IAA-DEA-DD<br>0055 | 1394.0<br>1466.0<br>1538.0 | 1900 | 648.9<br>732.9;<br>678.2 | 9.5  | 351<br>349<br>354 | 686.7; |
| IAA-DEA-DD<br>0056 | 1394.0<br>1466.1<br>1538.1 | 1900 | 538.9<br>595.3;<br>558.3 | 10.5 | 341<br>344<br>347 | 564.2; |
| IAA-DEA-DD<br>0057 | 1394.6<br>1466.6<br>1538.6 | 1900 | 558.0<br>618.7;<br>554.5 | 9.1  | 341<br>355<br>345 | 577.1; |
| IAA-DEA-DD<br>0058 | 1394.4<br>1466.3<br>1538.5 | 1900 | 298.6<br>305.7;<br>285.6 | 8.9  | 286<br>305<br>300 | 296.5; |
| IAA-DEA-DD<br>0059 | 1393.8<br>1465.8<br>1537.8 | 1900 | 505.6<br>633.5;<br>613.4 | 7.2  | 327<br>342<br>341 | 584.2; |
| IAA-DEA-DD<br>0060 | 1394.4<br>1466.4<br>1538.4 | 1900 | 499.2<br>541.1;<br>478.9 | 8.6  | 321<br>333<br>323 | 506.3; |
| IAA-DEA-DD<br>0061 | 1394.7<br>1466.8<br>1538.8 | 1900 | 550.6<br>556.7;<br>513.1 | 9.9  | 341<br>344<br>344 | 540.1; |
| IAA-DEA-DD<br>0062 | 1394.2<br>1466.2<br>1538.2 | 1900 | 639.8<br>700.4;<br>617.1 | 10.4 | 338<br>345<br>344 | 652.3; |
| IAA-DEA-DD         | 1394.6                     | 1900 | 623.8                    | 9.1  | 339               | 607.2; |

|                    |                            |       |                          |      |                   |        |
|--------------------|----------------------------|-------|--------------------------|------|-------------------|--------|
| 0063               | 1466.6<br>1538.6           |       | 634.9;<br>563.2          |      | 339<br>328        |        |
| IAA-DEA-DD<br>0064 | 1394.1<br>1466.2<br>1538.2 | 1900  | 527.4<br>588.2;<br>572.9 | 7.4  | 339<br>331<br>340 | 562.7; |
| IAA-DEA-DD<br>0065 | 1394.5<br>1466.5<br>1538.6 | 1900  | 331.9<br>379.5;<br>361.6 | 8.4  | 277<br>296<br>297 | 357.7; |
| IAA-DEA-DD<br>0066 | 1394.8<br>1466.9<br>1539.0 | 1900  | 589.2<br>603.0;<br>516.0 | 9.9  | 343<br>355<br>343 | 569.3; |
| IAA-DEA-DD<br>0067 | 1394.8<br>1466.9<br>1538.9 | 1900  | 514.7<br>546.0;<br>478.4 | 9.5  | 342<br>346<br>344 | 513.0; |
| IAA-DEA-DD<br>0068 | 1394.6<br>1466.7<br>1538.7 | 1900  | 604.4<br>590.2;<br>540.6 | 9.3  | 346<br>338<br>349 | 578.3; |
| IAA-DEA-DD<br>0069 | 1394.6<br>1466.7<br>1538.7 | 1900  | 538.2<br>585.2;<br>523.6 | 10.0 | 328<br>348<br>344 | 549.0; |
| IAA-DEA-DD<br>0070 | 1394.1<br>1466.1<br>1538.1 | 1900  | 506.7<br>599.8;<br>547.4 | 7.3  | 336<br>350<br>351 | 551.2; |
| IAA-DEA-DD<br>0071 | 1395.0<br>1467.1<br>1539.4 | 1900  | 487.5<br>490.4;<br>433.4 | 9.4  | 349<br>348<br>349 | 470.3; |
| IAA-DEA-DD<br>0072 | 1394.0<br>1466.0<br>1538.0 | 1900  | 563.6<br>687.4;<br>648.6 | 7.7  | 341<br>353<br>347 | 633.1; |
| IAA-DEA-DD<br>0073 | 1394.2<br>1466.2<br>1538.2 | 1900  | 578.9<br>611.5;<br>569.5 | 9.1  | 331<br>328<br>336 | 586.5; |
| IAA-DEA-DD<br>0074 | 1394.9<br>1466.9<br>1539.0 | 1900  | 500.0<br>503.8;<br>465.1 | 9.1  | 343<br>343<br>356 | 489.5; |
| IAA-DEA-DD<br>0075 | 1394.6<br>1466.7<br>1538.7 | 11900 | 607.2<br>614.0;<br>538.7 | 10.2 | 352<br>352<br>351 | 586.5; |
| IAA-DEA-DD<br>0076 | 1394.3<br>1466.4<br>1538.5 | 1900  | 574.0<br>712.4;<br>625.8 | 9.0  | 354<br>360<br>349 | 637.3; |
| IAA-DEA-DD<br>0077 | 1394.4<br>1466.5<br>1538.5 | 1900  | 744.3<br>896.4;<br>842.6 | 9.6  | 352<br>357<br>361 | 827.8; |
| IAA-DEA –DD        | 1394.7                     | 1900  | 680.6                    | 9.0  | 343               | 686.5; |

|                    |                            |      |                          |      |                   |        |
|--------------------|----------------------------|------|--------------------------|------|-------------------|--------|
| 0078               | 1466.7<br>1538.8           |      | 743.3;<br>635.9          |      | 360<br>339        |        |
| IAA-DEA-DD<br>0079 | 1394.1<br>1466.1<br>1538.2 | 1900 | 609.4<br>744.1;<br>710.0 | 8.4  | 350<br>361<br>355 | 687.7; |
| IAA-DEA-DD<br>0080 | 1394.7<br>1466.8<br>1539.0 | 1900 | 703.3<br>764.2;<br>669.3 | 8.8  | 347<br>362<br>351 | 712.3; |
| IAA-DEA-DD<br>0081 | 1394.8<br>1466.9<br>1539.0 | 1900 | 628.9<br>685.7;<br>607.2 | 9.7  | 357<br>352<br>353 | 640.5; |
| IAA-DEA-DD<br>0082 | 1394.5<br>1466.5<br>1538.6 | 1900 | 779.1<br>890.0;<br>832.3 | 9.3  | 358<br>369<br>373 | 833.7; |
| IAA-DEA-DD<br>0083 | 1394.1<br>1466.1<br>1538.2 | 1900 | 552.1<br>652.0;<br>609.3 | 8.4  | 326<br>337<br>333 | 604.5; |
| IAA-DEA-DD<br>0084 | 1394.2<br>1466.2<br>1538.2 | 1900 | 724.4<br>831.3;<br>749.3 | 10.8 | 349<br>356<br>350 | 768.2; |
| IAA-DEA-DD<br>0085 | 1394.7<br>1466.8<br>1538.9 | 1900 | 600.7<br>601.3;<br>542.7 | 10.0 | 347<br>355<br>352 | 581.6; |
| IAA-DEA-DD<br>0086 | 1394.3<br>1466.3<br>1538.3 | 1900 | 655.7<br>723.3;<br>654.2 | 10.4 | 345<br>349<br>348 | 677.6; |
| IAA-DEA-DD<br>0087 | 1394.1<br>1466.2<br>1538.2 | 1900 | 646.3<br>679.6;<br>607.5 | 10.1 | 361<br>350<br>355 | 644.5; |
| IAA-DEA-DD<br>0088 | 1394.6<br>1466.5<br>1538.6 | 1900 | 516.7<br>573.9;<br>506.4 | 10.6 | 326<br>327<br>324 | 532.2; |
| IAA-DEA-DD<br>0089 | 1394.5<br>1466.5<br>1538.5 | 1900 | 472.2<br>509.4;<br>486.8 | 9.4  | 311<br>315<br>323 | 489.5; |
| IAA-DEA-DD<br>0090 | 1394.4<br>1466.4<br>1538.4 | 1900 | 581.1<br>621.9;<br>556.3 | 9.6  | 330<br>342<br>337 | 586.3; |
| IAA-DEA-DD<br>0091 | 1394.5<br>1466.5<br>1538.5 | 1900 | 639.5<br>642.8;<br>565.2 | 10.0 | 343<br>342<br>338 | 615.7; |
| IAA-DEA-DD<br>0092 | 1394.9<br>1467.0<br>1539.1 | 1900 | 595.5<br>609.2;<br>523.0 | 9.4  | 341<br>343<br>340 | 575.9; |
| IAA-DEA-DD         | 1394.6                     | 1900 | 540.9                    | 9.8  | 332               | 547.8; |



|                     |                            |      |                          |      |                   |        |
|---------------------|----------------------------|------|--------------------------|------|-------------------|--------|
| 0093                | 1466.7<br>1538.8           |      | 573.5;<br>528.9          |      | 329<br>336        |        |
| IAA-DEA-DD<br>0094  | 1393.6<br>1465.5<br>1537.5 | 1900 | 535.9<br>618.1;<br>576.0 | 8.2  | 339<br>346<br>344 | 576.7; |
| IAA-DEA-DD<br>0095  | 1393.7<br>1465.7<br>1537.8 | 1900 | 642.2<br>703.2;<br>604.8 | 8.3  | 339<br>347<br>338 | 650.1; |
| IAA-DEA-DD<br>0096  | 1394.0<br>1466.0<br>1538.1 | 1900 | 481.6<br>544.2;<br>495.0 | 9.0  | 322<br>336<br>333 | 506.8; |
| IAA-DEA-DD<br>0097  | 1393.3<br>1465.3<br>1537.2 | 1900 | 565.6<br>641.0;<br>644.4 | 10.0 | 326<br>328<br>341 | 617.0; |
| IAA-DEA-DD<br>0098  | 1393.8<br>1465.8<br>1537.8 | 1900 | 507.4<br>540.9;<br>515.0 | 10.5 | 314<br>311<br>331 | 521.1; |
| IAA-DEA-DD<br>0099  | 1393.8<br>1465.8<br>1537.8 | 1900 | 504.5<br>566.6;<br>524.6 | 9.9  | 322<br>329<br>335 | 531.9; |
| IAA-DEA-DD<br>00100 | 1394.0<br>1466.1<br>1538.1 | 1900 | 555.8<br>557.1;<br>516.7 | 9.7  | 345<br>333<br>347 | 543.1  |
